# Supplementary material for: Base editing-mediated one-step inactivation of the Dnmt gene family reveals critical roles of DNA methylation during mouse gastrulation
Source: PubMed Central journal article supplement (PMC10203112; doi:10.1038/s41467-023-38528-z), 2023-05-22
Supplement: 41467_2023_38528_MOESM1_ESM.pdf [file 41467_2023_38528_MOESM1_ESM.pdf]

## *Supplemental material*

### **Base editing-mediated one-step inactivation of the *Dnmt* gene family reveals critical roles of DNA methylation during mouse gastrulation**

Qing Li<sup>1,#</sup>, Jiansen Lu<sup>2,#</sup>, Xidi Yin<sup>1,#</sup>, Yunjian Chang<sup>3,#</sup>, Chao Wang<sup>3,#</sup>, Meng Yan<sup>4,#</sup>, Li Feng<sup>5,6,7</sup>, Yanbo Cheng<sup>8</sup>, Yun Gao<sup>2</sup>, Beiyang Xu<sup>3</sup>, Yao Zhang<sup>3</sup>, Yingyi Wang<sup>8</sup>, Guizhong Cui<sup>1</sup>, Luang Xu<sup>3</sup>, Yidi Sun<sup>5</sup>, Rong Zeng<sup>6</sup>, Yixue Li<sup>7</sup>, Naihe Jing<sup>1</sup>, Guo-Liang Xu<sup>3,\*</sup>, Ligang Wu<sup>3,\*</sup>, Fuchou Tang<sup>2,\*</sup> & Jinsong Li<sup>1,4,8,\*</sup>

<sup>1</sup>State Key Laboratory of Cell Biology, Shanghai Key Laboratory of Molecular Andrology, Shanghai Institute of Biochemistry and Cell Biology, Center for Excellence in Molecular Cell Science, Chinese Academy of Sciences, University of Chinese Academy of Sciences, Shanghai, China.

<sup>2</sup>School of Life Sciences, Biomedical Pioneering Innovation Center, Beijing Advanced Innovation Center for Genomics, Peking University, Beijing, China.

<sup>3</sup>State Key Laboratory of Molecular Biology, Shanghai Key Laboratory of Molecular Andrology, Shanghai Institute of Biochemistry and Cell Biology, Center for Excellence in Molecular Cell Science, Chinese Academy of Sciences, Shanghai, China.

<sup>4</sup>School of Life Science, Hangzhou Institute for Advanced Study, University of Chinese Academy of Sciences, Hangzhou, China.

<sup>5</sup>Institute of Neuroscience, CAS Center for Excellence in Brain Science and Intelligence Technology, Chinese Academy of Sciences, Shanghai, China.

<sup>6</sup>CAS Key Laboratory of Systems Biology, Center for Excellence in Molecular Cell Science, Institute of Biochemistry and Cell Biology, Chinese Academy of Sciences, Shanghai, China.

<sup>7</sup>Bio-Med Big Data Center, Key Laboratory of Computational Biology, CAS-MPG Partner Institute for Computational Biology, Shanghai Institute of Nutrition and Health, Chinese Academy of Sciences, Shanghai, China.

<sup>8</sup>School of Life Science and Technology, Shanghai Tech University, Shanghai, China.

<sup>#</sup>These authors contributed equally: Qing Li, Jiansen Lu, Xidi Yin, Yunjian Chang, Chao Wang, Meng Yan.

\*e-mail: glxu@sibcb.ac.cn; lgwu@sibcb.ac.cn; tangfuchou@pku.edu.cn; jsli@sibcb.ac.cn.

#### **Supplementary Materials**

Supplementary Figs. 1-19

Supplementary References

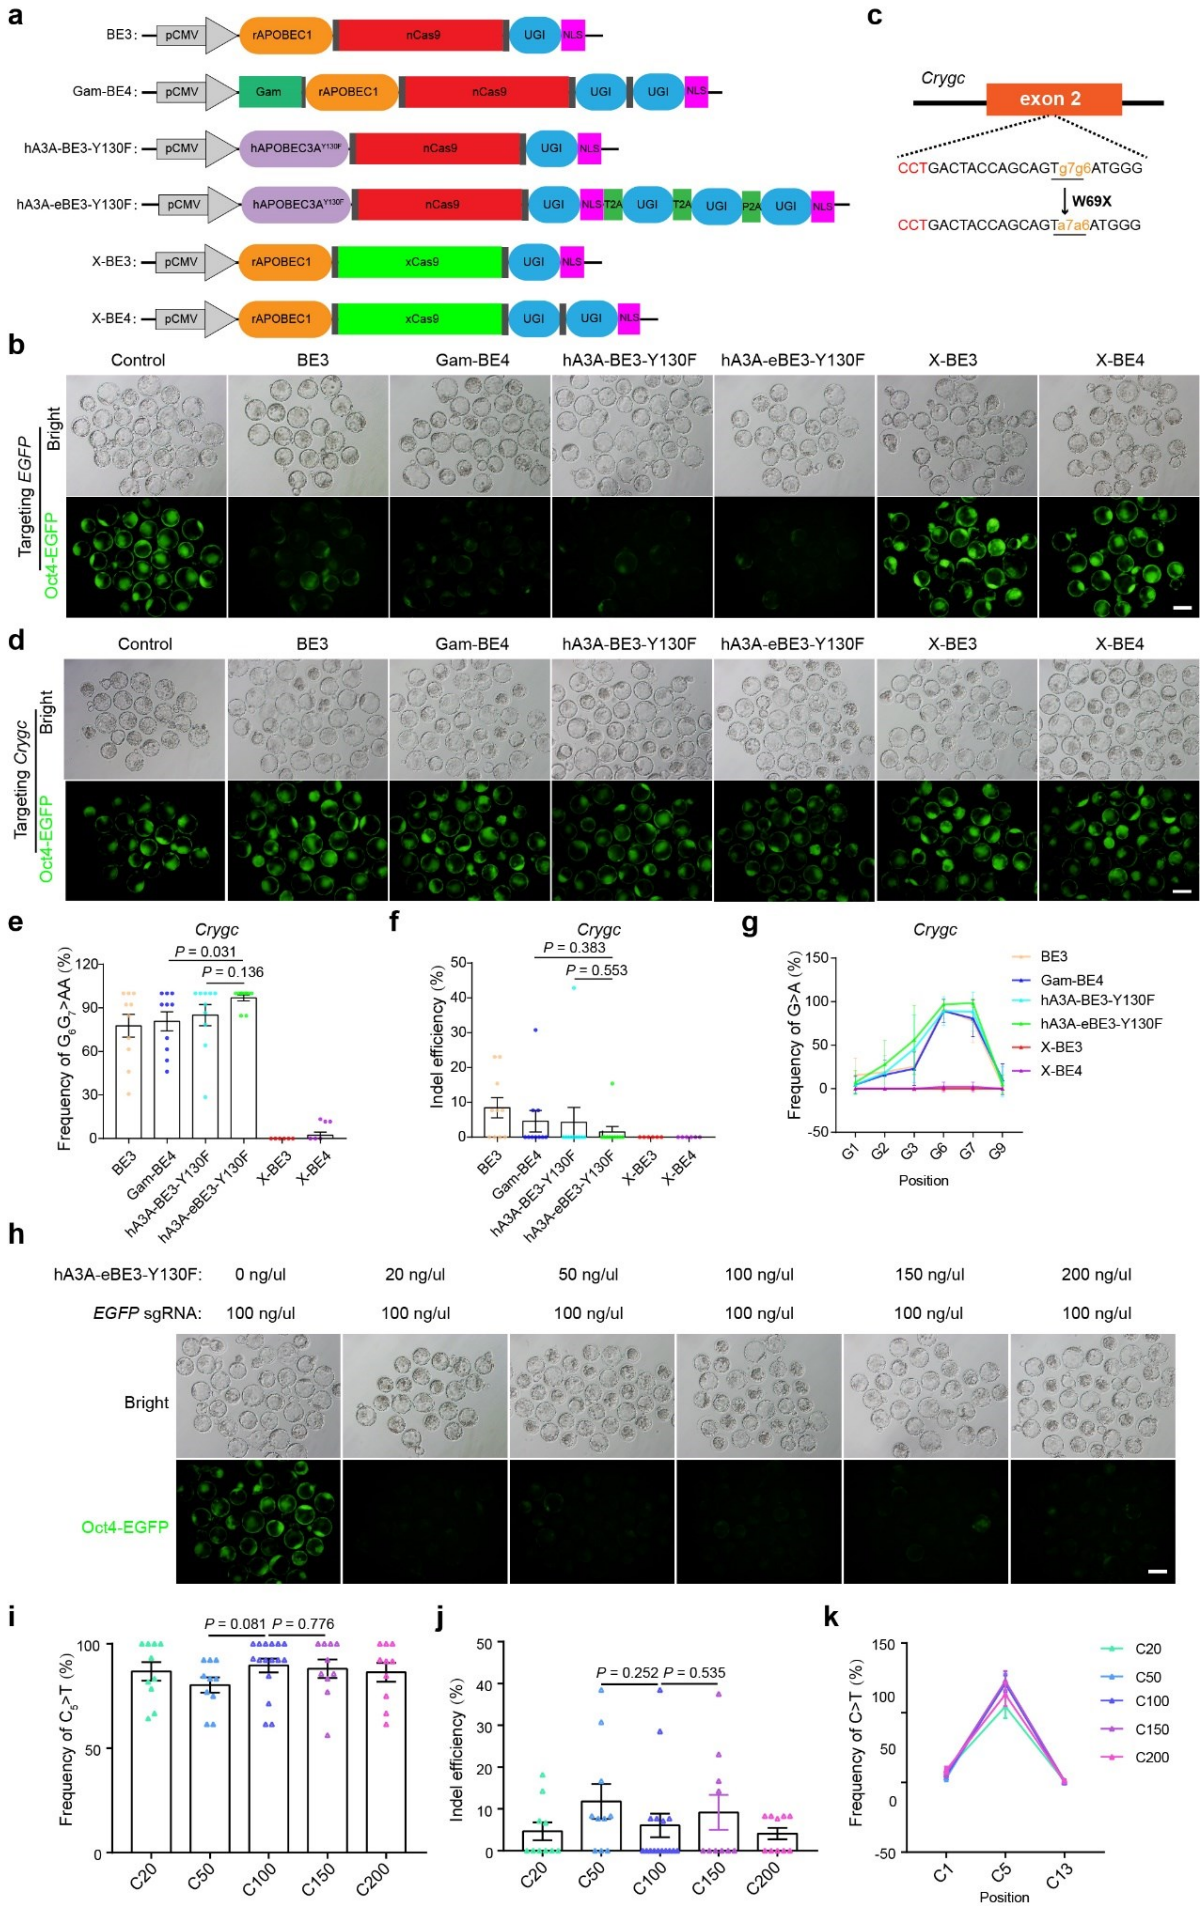

**Supplementary Fig. 1 | hA3A-eBE3-Y130F is the most efficient base editor for inducing stop codon in zygotes.**

**a**, Schematic illustration of six reported base editors, including BE3, Gam-BE4, hA3A-BE3-Y130F, hA3A-eBE3-Y130F, X-BE3, and X-BE4. **b**, Representative images of blastocysts obtained by injection of base-editor mRNA and sgRNA targeting *EGFP* into zygotes carrying *Oct4-EGFP* transgene. Three independent experiments were analyzed for each group. Scale bar, 200  $\mu\text{m}$ . **c**, The target sequence in *Crygc*. The PAM sequence and the intended mutant bases are shown in red and yellow, respectively. **d**, Representative images of blastocysts obtained by injection of base-editor mRNA and sgRNA targeting *Crygc* into zygotes carrying *Oct4-EGFP* transgene. Three independent experiments were analyzed for each group. Scale bar, 200  $\mu\text{m}$ . **e, f, g**, Efficiency analysis of on-target G-to-A base conversion (**e**), indels (**f**), and adjacent site mutation (**g**) induced by different base editors in *Crygc*. Data are mean  $\pm$  s.e.m for the indicated numbers of blastocysts. Detailed data are shown in Supplementary Data 1. *P*-values were determined by Student's unpaired two-sided *t*-test. **h**, Representative images of blastocysts obtained by injection of hA3A-eBE3-Y130F mRNA with different concentrations (including 0 ng/ $\mu\text{l}$ , 20 ng/ $\mu\text{l}$ , 50 ng/ $\mu\text{l}$ , 100 ng/ $\mu\text{l}$ , 150 ng/ $\mu\text{l}$ , and 200 ng/ $\mu\text{l}$ ) and sgRNA targeting *EGFP* (100 ng/ $\mu\text{l}$ ) into zygotes carrying *Oct4-EGFP* transgene. Three independent experiments were analyzed for each group. Scale bar, 100  $\mu\text{m}$ . **i, j, k**, Statistical analysis of on-target C-to-T base conversions (**i**), indels (**j**), and adjacent site mutation (**k**) in *EGFP* site induced by hA3A-eBE3-Y130F mRNA with different concentrations (C20,  $n = 10$ ; C50,  $n = 10$ ; C100,  $n = 16$ ; C150,  $n = 10$ ; C200,  $n = 10$ ;) and *EGFP*-sgRNA in blastocysts. Detailed data are shown in Supplementary Data 1. *n*, the number of collected blastocysts. Data are mean  $\pm$  s.e.m for the indicated numbers of blastocysts. *P*-values were determined by Student's unpaired two-sided *t*-test. All source data are provided as a Source Data file.

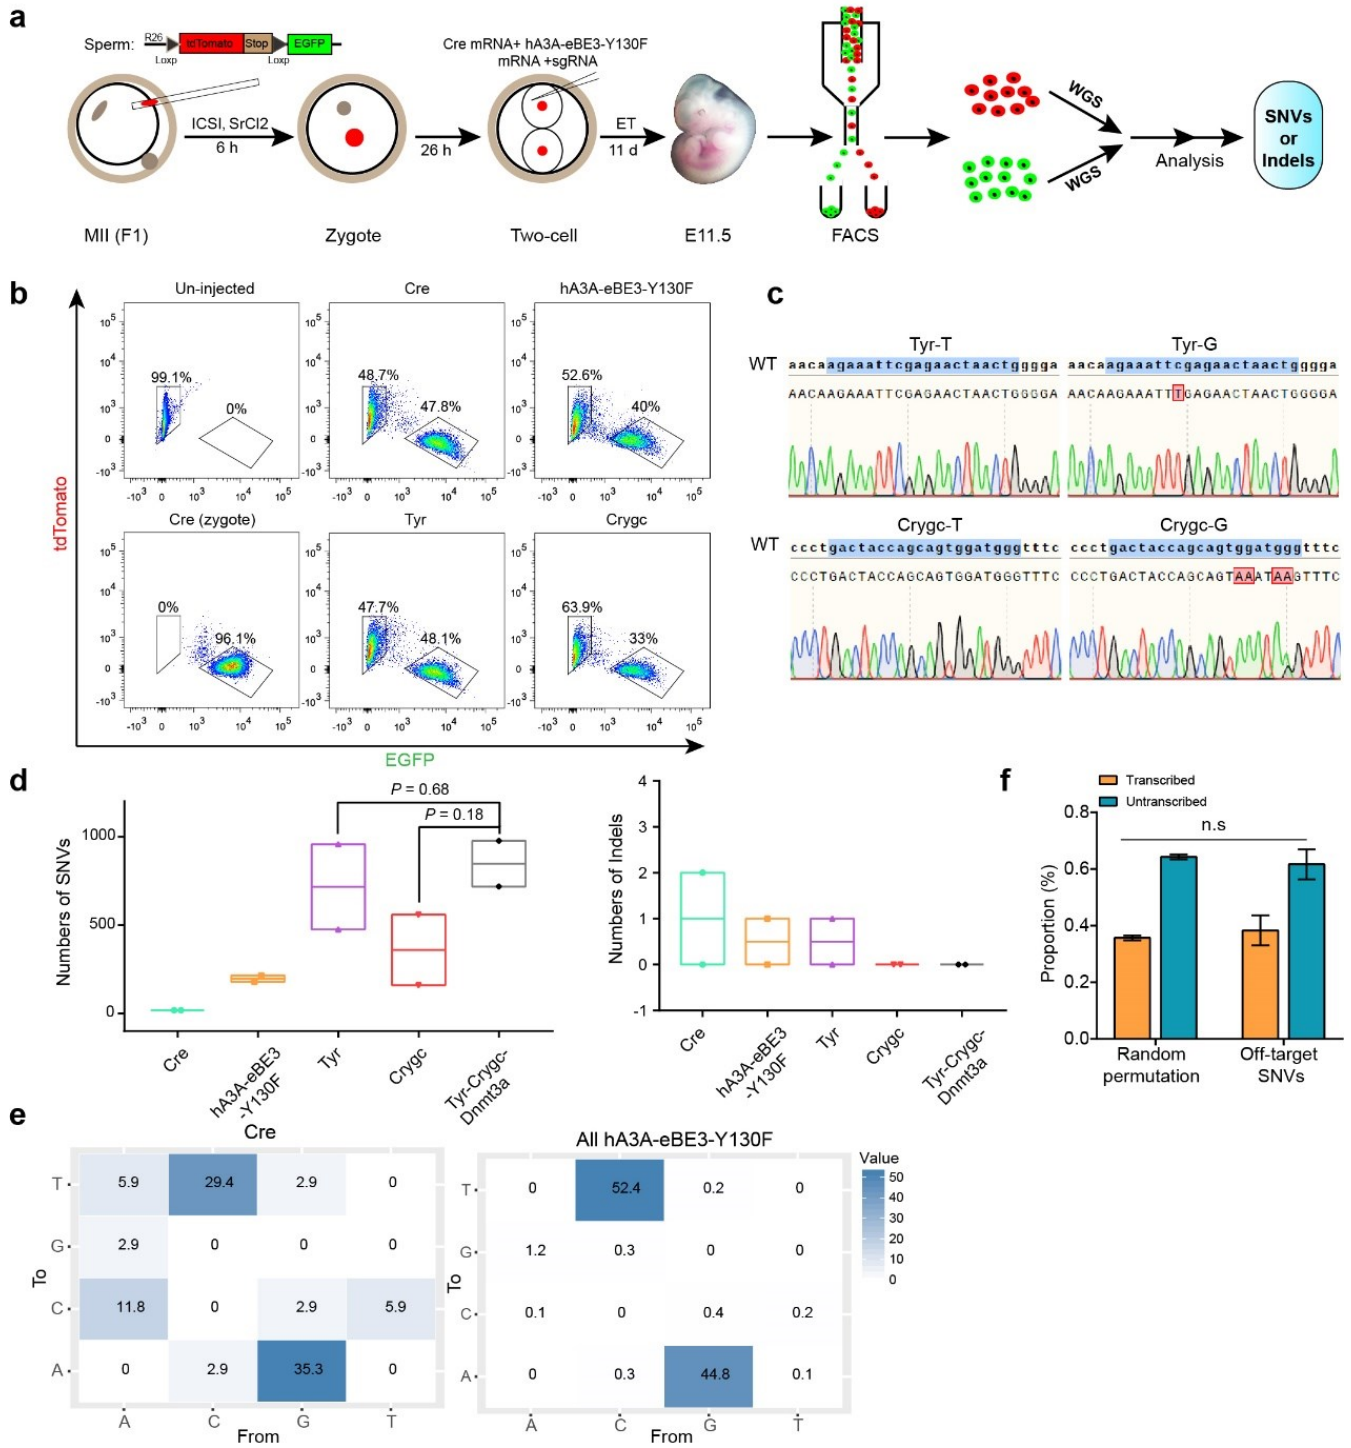

**Supplementary Fig. 2 | GOIT analysis reveals minor and random off-target mutations induced by hA3A-eBE3-Y130F.**

**a**, Experimental procedure of GOIT (genome-wide off-target analysis by two-cell embryo injection) to detect off-target of hA3A-eBE3-Y130F. **b**, Representative images of FACS gating strategy for collection of EGFP positive cells and tdTomato positive cells from E11.5 embryos derived by injection of RNAs into one blastomere of the two-cell embryos. Four RNA injection groups (two repeats for each one) include Cre mRNA only (Cre), mRNA of Cre and hA3A-eBE3-Y130F, mRNA of Cre and hA3A-eBE3-Y130F and *Tyr*-sgRNA (Tyr), and mRNA of Cre and hA3A-eBE3-Y130F and *Crygc*-sgRNA (Crygc). EGFP positive cells are derived from injected blastomere and tdTomato positive cells are derived from un-injected blastomere. The enriched cells were used for whole genome sequencing (WGS) analysis. **c**, Sanger sequencing of DNA from tdTomato positive cells (T) and EGFP positive cells (G) in Tyr and Crygc groups, indicating that tdTomato positive cells are wild-type and EGFP positive cells harbor mutant *Tyr* or *Crygc*. **d**, Total number of off-target SNVs and indels detected by whole genome sequencing (WGS) in E11.5 embryos from five groups. Try-Crygc-Dnmt3a group means injecting a mixture of Cre and hA3A-eBE3-Y130F mRNA with *Tyr*, *Crygc*, and *Dnmt3a* sgRNAs. *P*-values were determined by Student's unpaired two-sided *t*-test. Floating bars show minima to maxima from two biological replicates. Lists of off-target SNVs and indels are presented in Supplementary Data 2. **e**, Mutation type distributions of SNVs shown in (d). The number in each cell indicates the proportion of a certain type of mutation among all mutations, indicating that more than 97% of SNVs are C>T/G>A base conversions induced by hA3A-eBE3-Y130F. **f**, Genomic distribution of off-target SNVs induced by hA3A-eBE3-Y130F ( $n = 2580$ ) or random permutation ( $n = 3.0E7$ ) according to transcription and non-transcription regions, showing no significant difference between hA3A-eBE3-Y130F-induced SNVs and random permutation.  $n$  means the number of SNV sites. Data are mean  $\pm$  SD. *P*-value =1 was calculated by the two-sided Fisher's exact test. All source data are provided as a Source Data file.

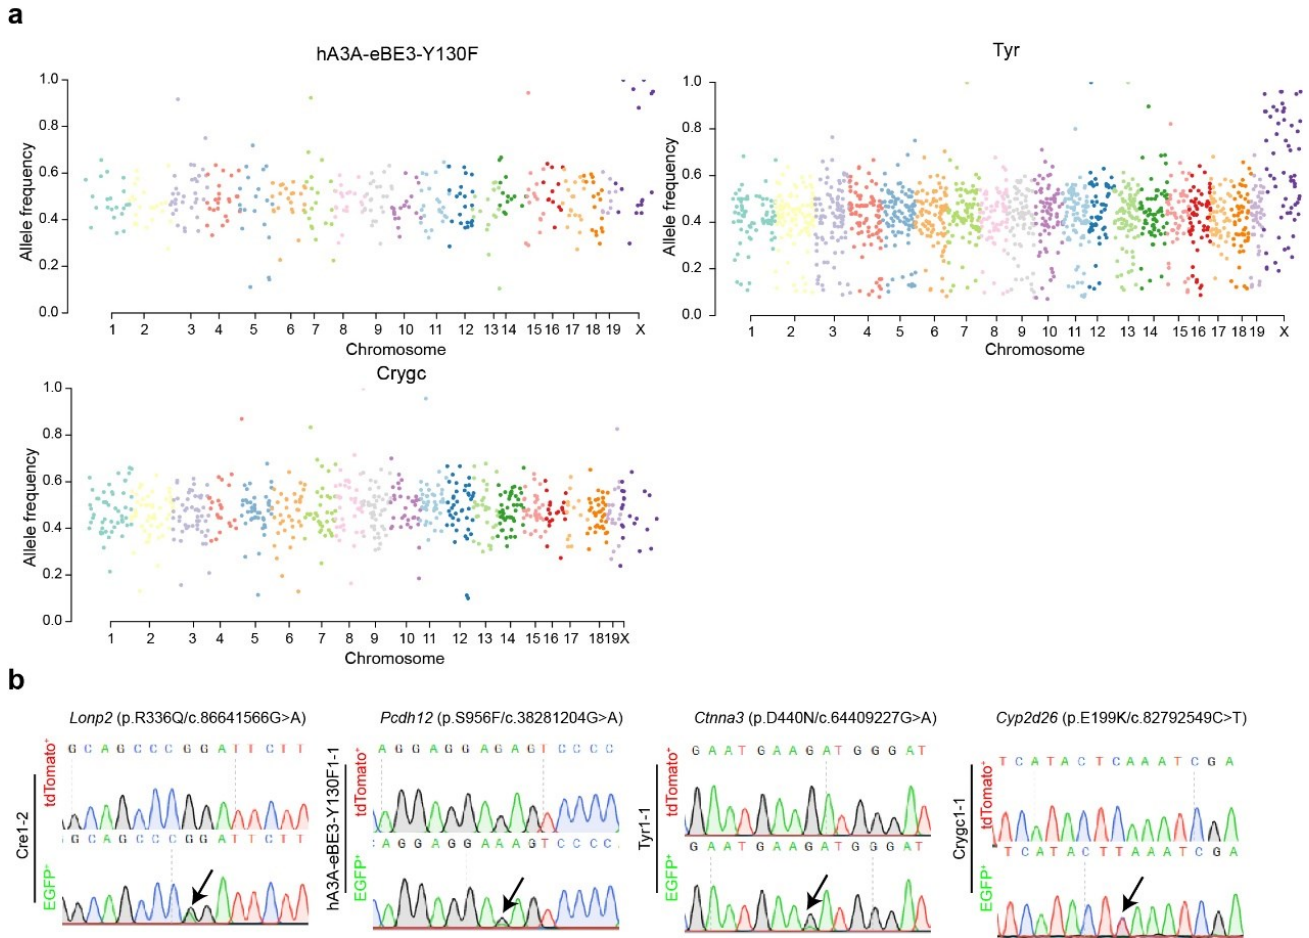

**Supplementary Fig. 3 | The distribution of off-target mutations in the genome.**

**a**, The Manhattan plot shows the distribution of all off-target mutations of different groups (hA3A-eBE3-Y130F, Tyr, and Crygc) in the genome. The abscissa is the location of the mutations on the chromosome, and the ordinate is the frequency of each mutation. Each point presents a mutation (SNV or indel), and the different colors indicate different chromosomes. **b**, Representative Sanger sequence chromatograms show the verification results of non-synonymous off-target mutations in each group. Summary of the verification was shown in Supplementary Data 2. Black arrows indicate the mutant sites. All check primers are listed in Supplementary Data 9. All source data are provided as a Source Data file.



**Supplementary Fig. 4 | One-step generation of *Tet*-TKO embryos by IMGZ.**

**a**, Schematic of the procedure to design sgRNAs to target *Tet2* using Base-Editor. Base-Editor website has been established to design sgRNAs of cytosine base editors to induce stop codons in a specific gene. Coded by C# ASP.NET. Gene name or Refseq ID is required for sgRNA designing. **b**, Sequence of sgRNAs designed by Base-Editor for targeting *Tet1*, *Tet2*, and *Tet3*, respectively. The PAM sequence and the intended mutant base are shown in red and green, respectively. **c, d, e**, Representative images of blastocysts obtained by injection of hA3A-eBE3-Y130F mRNA and different sgRNAs targeting *Tet1* (**c**), *Tet2* (**d**), and *Tet3* (**e**), respectively, into zygotes carrying *Oct4-EGFP* transgene. Scale bar, 100  $\mu$ m. Three independent experiments were analyzed for each group. **f**, Representative images of *Tet1/2/3*-TKO blastocysts. Green fluorescence indicates the expression of *Oct4-EGFP*. Scale bar, 50  $\mu$ m. Three independent embryos were analyzed for each group. **g**, The editing efficiencies of mutant sites in three *Tet1/2/3*-TKO blastocysts detected by blunting cloning sequencing. All source data are provided as a Source Data file.



**a**

| <i>Dnmt1</i>                                | <i>Dnmt3a</i>                                  | <i>Dnmt3b</i>                                |
|---------------------------------------------|------------------------------------------------|----------------------------------------------|
| Dnmt1-sg1: ATCAATCAGTGGTGGCTCAGTGG<br>Q528X | Dnmt3a-sg1: GAGGAAcAGGAGGAGAACCGTGG<br>Q26X    | Dnmt3b-sg1: CCATGTGcAGGAGTACCCTGTGG<br>Q162X |
| Dnmt1-sg2: GTCTGTcAGCAGCCTGAGTGTGG<br>Q723X | Dnmt3a-sg2: GACTGcGAGGTGGCTTGGGCtGG<br>R167X   | Dnmt3b-sg2: GTATcAGGTAAAGCCTGAGAAGG<br>Q237X |
| Dnmt1-sg3: GTAAGcAGGCTTGCCTCAAGAGG<br>Q746X | Dnmt3a-sg3: cCATTAAAGGAAGACCCCTGGcAAC<br>W577X | Dnmt3b-sg3: TCCAAGcGACAGGCCATGCCCGG<br>R271X |

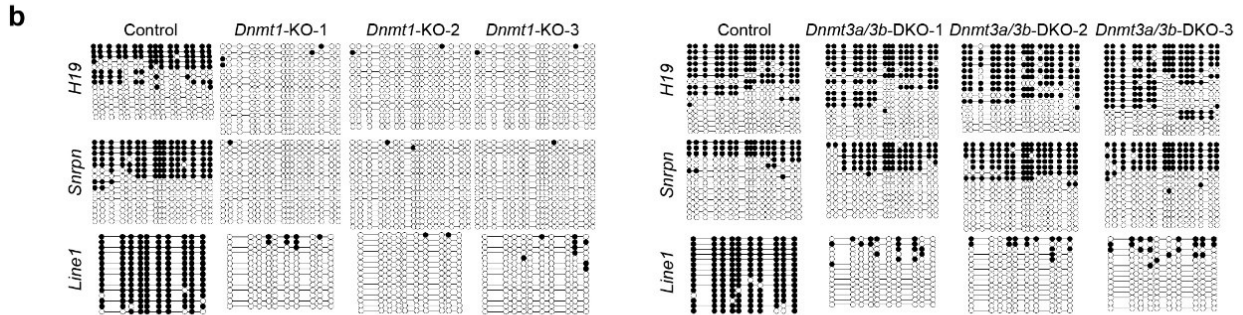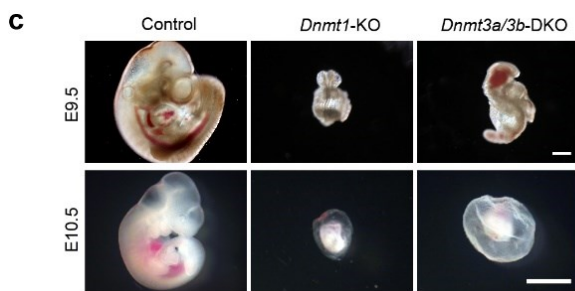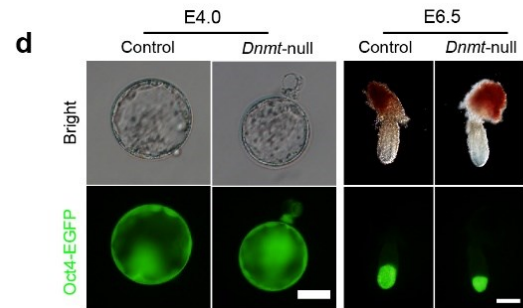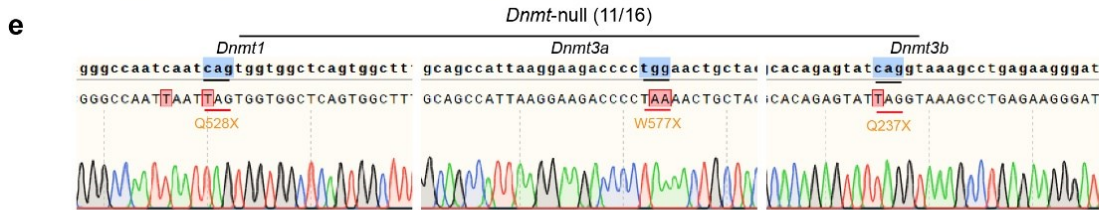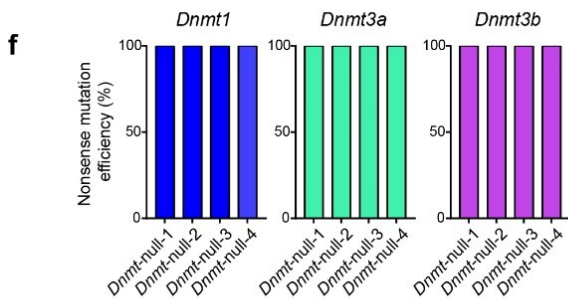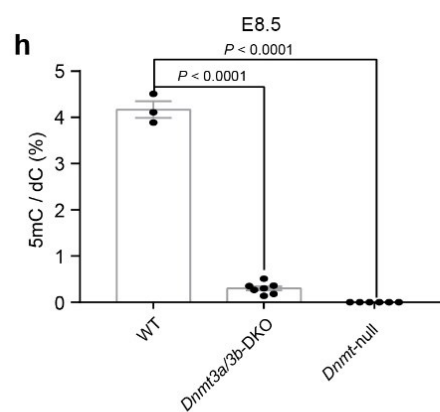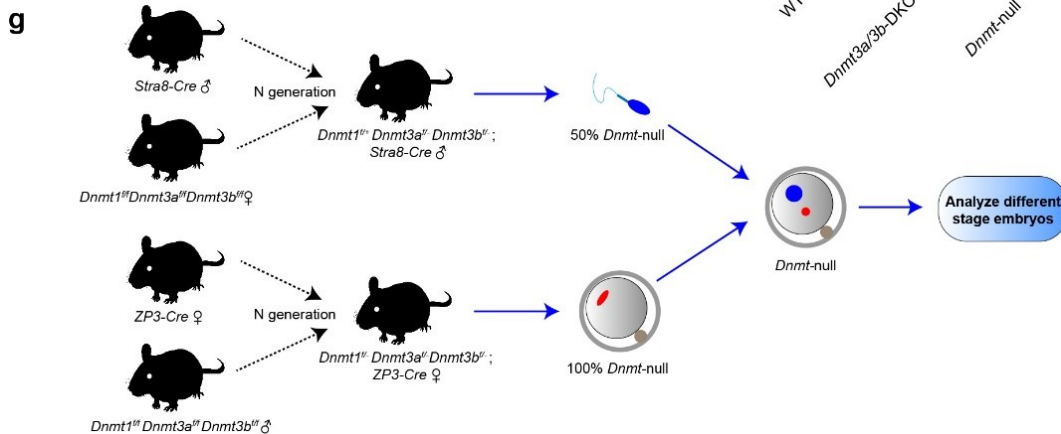

**Supplementary Fig. 5 | Generation of *Dnmt1*-KO, *Dnmt3a/3b*-DKO, and *Dnmt*-null embryos by the IMGZ system and mating.**

**a**, Sequence of sgRNAs designed by Base-Editor for targeting *Dnmt1*, *Dnmt3a*, and *Dnmt3b*, respectively. The PAM sequence and the intended mutant base are shown in red and green, respectively. **b**, Methylation analysis of *H19*-DMR, *Snrpn*-DMR, and *Line1* promoter in *Dnmt1*-KO and *Dnmt3a/3b*-DKO embryos. DNA was extracted from E9.5 embryos. Open circles represent unmethylated CpG sites, whereas filled circles represent methylated CpG sites. **c**, Representative images of *Dnmt1*-KO and *Dnmt3a/3b*-DKO embryos at E9.5 and E10.5 generated by the IMGZ system. Three independent embryos were analyzed for each group. Scale bars, 500  $\mu$ m in the up panel and 2 mm in the down panel. **d**, Representative images of *Dnmt*-null blastocysts and E6.5 embryos. Green fluorescence indicates the expression of *Oct4-EGFP*. Three independent embryos were analyzed for each group. Scale bar, 50  $\mu$ m in the left panel and 100  $\mu$ m in the right panel. **e**, Representative Sanger sequence chromatograms of one *Dnmt*-null blastocyst. 11 of 16 checked blastocysts show homozygous mutant chromatograms. **f**, The editing efficiencies of mutant sites in four *Dnmt*-null blastocysts detected by blunting cloning sequencing. **g**, Strategy of generating *Dnmt*-null embryos using germline-specific conditional knockout parents (*Stra8-Cre* and *ZP3-Cre*). **h**, Frequencies of 5mC modified nucleotides in the genomic DNA of wild-type ( $n = 3$ ), *Dnmt3a/3b*-DKO ( $n = 7$ ) and *Dnmt*-null ( $n = 6$ ) embryos at E8.5 determined by quantitative mass spectrometry. Data are mean  $\pm$  s.e.m for the indicated biological replicates. *P*-values were determined by Student's unpaired two-sided *t*-test. All source data are provided as a Source Data file.

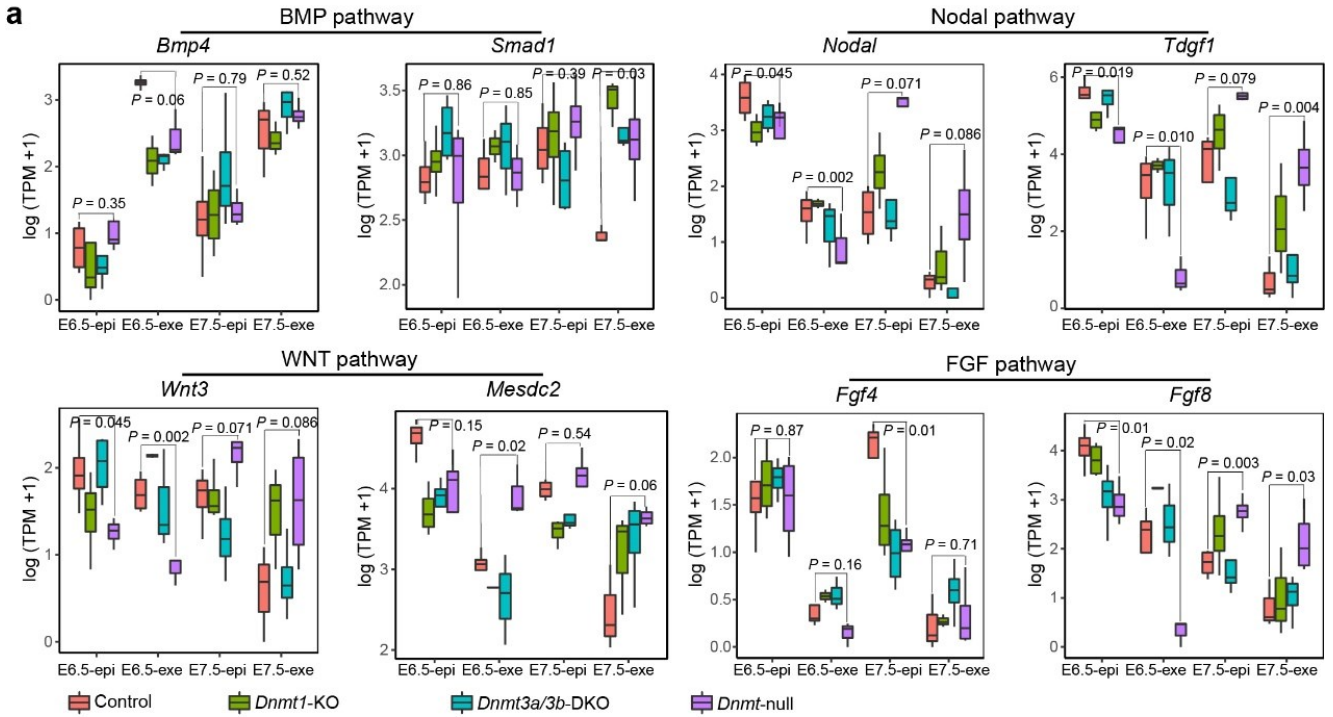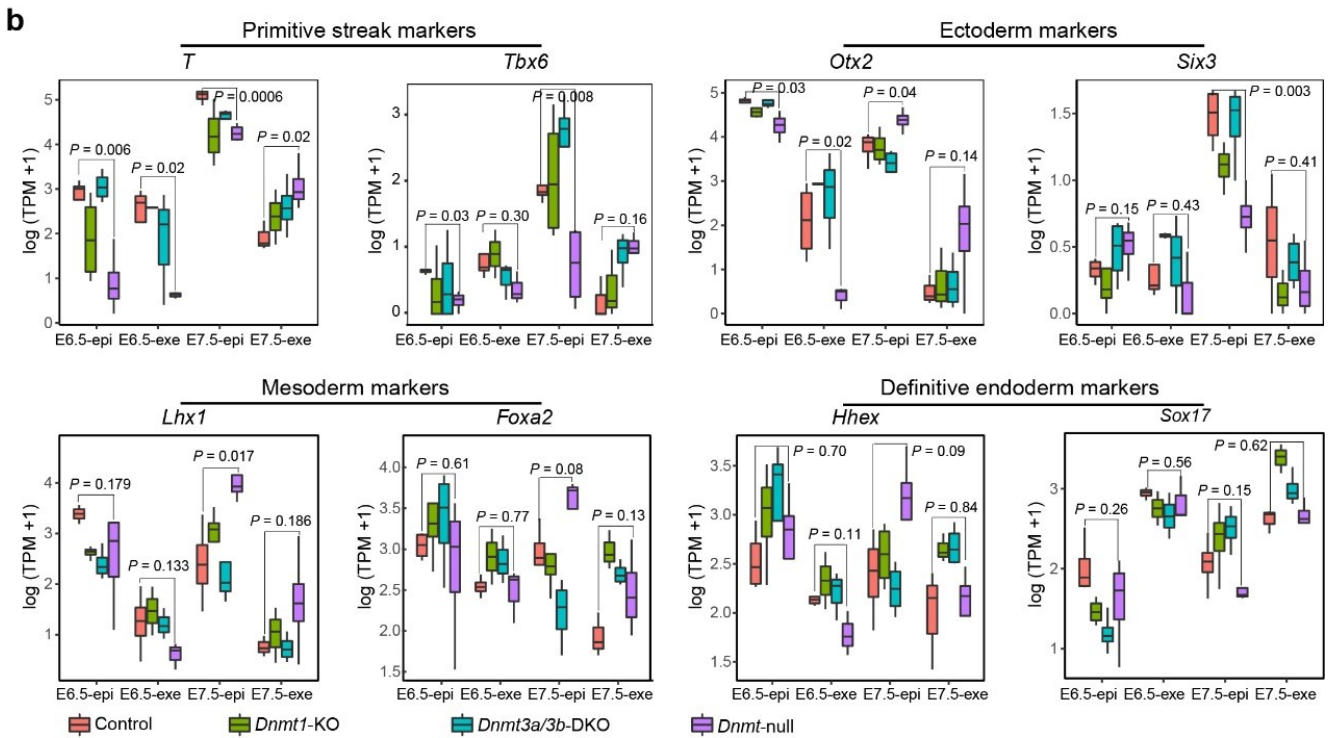

**Supplementary Fig. 6 | RNA-seq reveals impaired gastrulation-related pathways in *Dnmt*-null embryos.**

**a**, Box plots show the expression of critical genes involved in some canonical signaling pathways related to gastrulation and primitive streak formation in mice, including BMP, Nodal, WNT, and FGF pathways, in Exe and Epi at E6.5 and E7.5. The central lines are the median of data. The lower and upper hinges correspond to the 25th and 75th percentiles. The end of the lower and upper whiskers are  $1.5 * \text{IQR}$  (inter-quartile range). Data beyond the end of the whiskers are plotted as outliers. *P*-values were determined by unpaired two-sided *t*-test. **b**, Box plots show the expression of some lineage-specific markers, including primitive streak, ectoderm, mesoderm, and definitive endoderm, in Exe and Epi at E6.5 and E7.5. The central lines are the median of data. The lower and upper hinges correspond to the 25th and 75th percentiles. The end of the lower and upper whiskers are  $1.5 * \text{IQR}$  (inter-quartile range). Data beyond the end of the whiskers are plotted as outliers. *P*-values were determined by unpaired two-sided *t*-test. All source data are provided as a Source Data file.

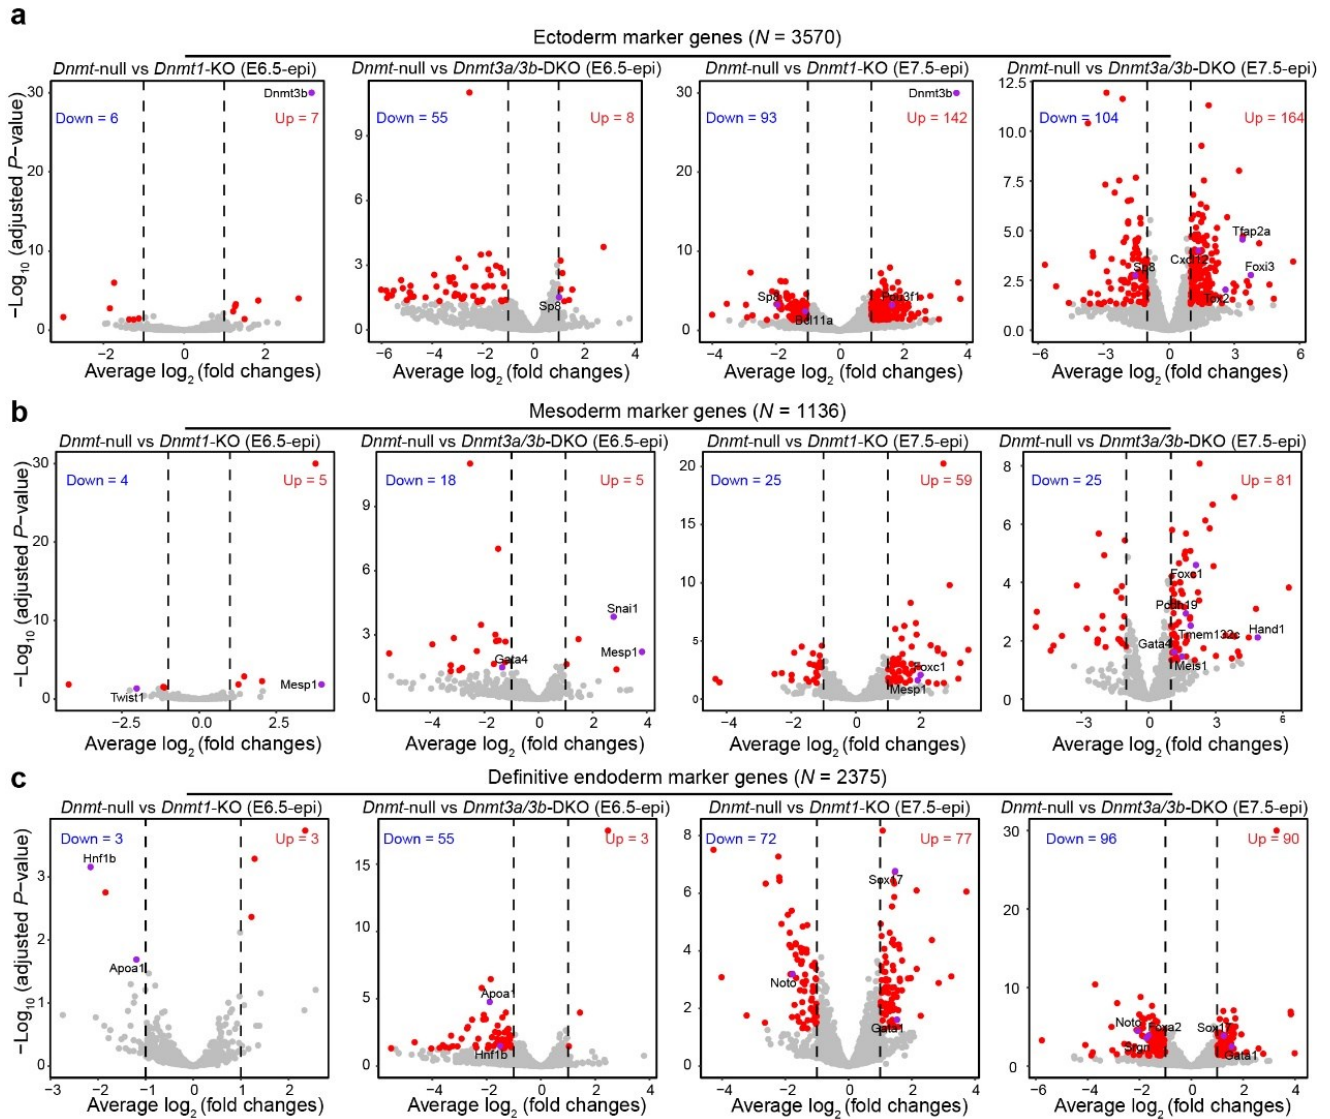

**Supplementary Fig. 7 | The mis-regulation of germ-layer enhancer-related genes in *Dnmt*-null embryos.**

**a-c**, Volcano plots show differentially expressed genes of *Dnmt*-null vs *Dnmt1*-KO and *Dnmt3a/3b*-DKO among genes located within 50kb around germ layer specific enhancer for ectoderm (**a**), mesoderm (**b**), and definitive endoderm (**c**), respectively, in E6.5 and E7.5 Epi (adjusted  $P$ -value  $< 0.05$ , FC  $> 2$ ).  $N$ , the number of marker genes located close to germ layer specific enhancer ( $\pm 50$ kb) identified by Argelaguet et al<sup>1</sup>.  $P$ -values were calculated by Deseq2. All source data are provided as a Source Data file.

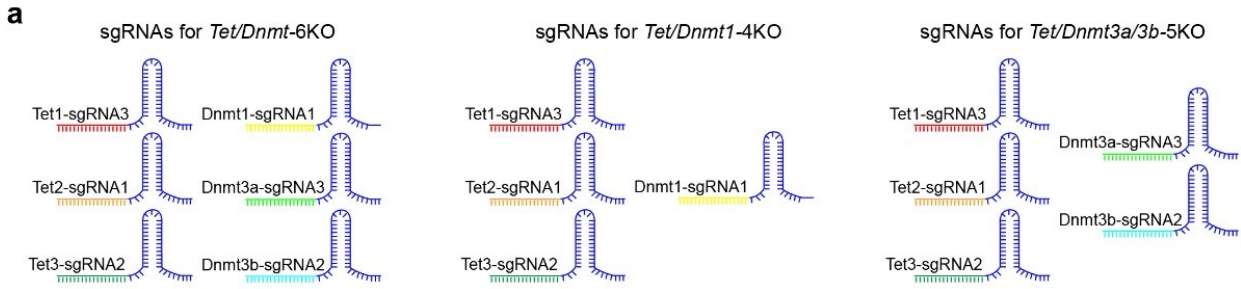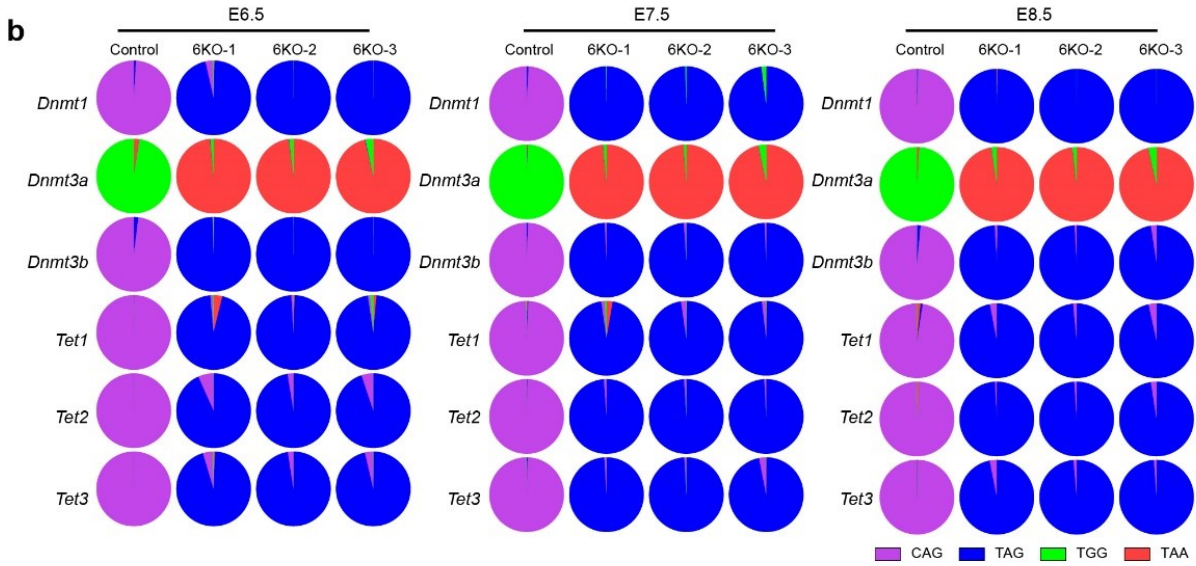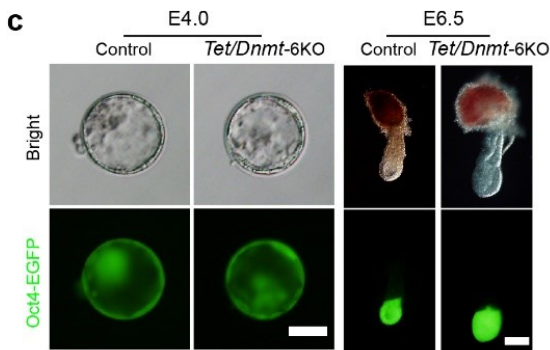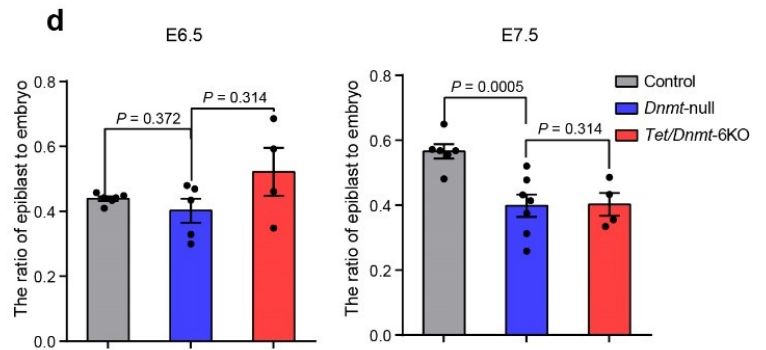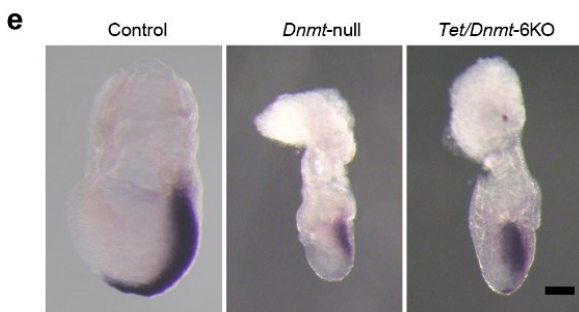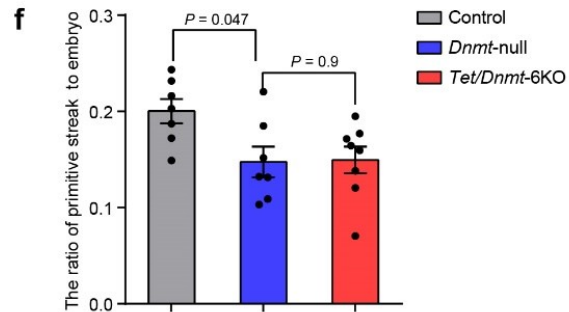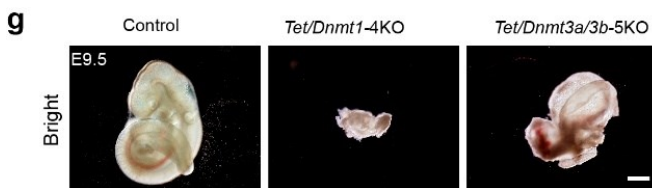

**Supplementary Fig. 8 | IMGZ-mediated generation of *Dnmt/Tet* mutant embryos.**

**a**, Schematic diagram of sgRNAs used to construct *Tet1/2/3;Dnmt1/3a/3b-6KO*, *Tet1/2/3;Dnmt1-4KO*, and *Tet1/2/3;Dnmt3a/3b-5KO* embryos through the IMGZ system. **b**, Deep sequencing analysis of genome mutant sites of one control and three *Tet/Dnmt-6KO* embryos at E6.5, E7.5, and E8.5. The results indicated the conversion of CAG or CGG codon of *Tet/Dnmt-6KO* into TAG or TAA stop codon in resultant embryos. **c**, Representative images of control and *Tet/Dnmt-6KO* embryos at E4.0 and E6.5. Green fluorescence indicates the expression of *Oct4-EGFP*. Three independent embryos were analyzed for each group. Scale bars, 50  $\mu\text{m}$  in the left panel and 200  $\mu\text{m}$  in the middle panel. **d**, The ratio of epiblast area to the whole embryo in control ( $n = 6$  for E6.5 and E7.5), *Dnmt*-null ( $n = 5$  for E6.5 and  $n = 7$  for E7.5), and *Tet/Dnmt-6KO* ( $n = 4$  for E6.5 and E7.5) embryos at E6.5 and E7.5. Epiblast was indicated by the signal of *Oct4-EGFP*. Data are mean  $\pm$  s.e.m of indicated biological replicates *P*-values were determined by Student's unpaired two-sided *t*-test. **e**, Representative images of RNA in situ hybridization of *T* probe in the control, *Dnmt*-null, and *Tet/Dnmt-6KO* embryos at E7.5, showing primitive streak elongation failure in these embryos. More than three independent embryos were analyzed for each group. Scale bar, 100  $\mu\text{m}$ . **f**, The ratio of primitive streak area to the whole embryo of control ( $n = 7$ ), *Dnmt*-null ( $n = 7$ ), and *Tet/Dnmt-6KO* ( $n = 8$ ) embryos at E7.5. The primitive streak was indicated by the signal of *T*. Data are mean  $\pm$  s.e.m of indicated biological replicates. *P*-values were determined by Student's unpaired two-sided *t*-test. **g**, Representative images of control, *Tet/Dnmt1-4KO*, and *Tet/Dnmt3a/3b-5KO* embryos at E9.5 generated by the IMGZ system. Three independent embryos were analyzed for each group. Scale bar, 500  $\mu\text{m}$ . All source data are provided as a Source Data file.

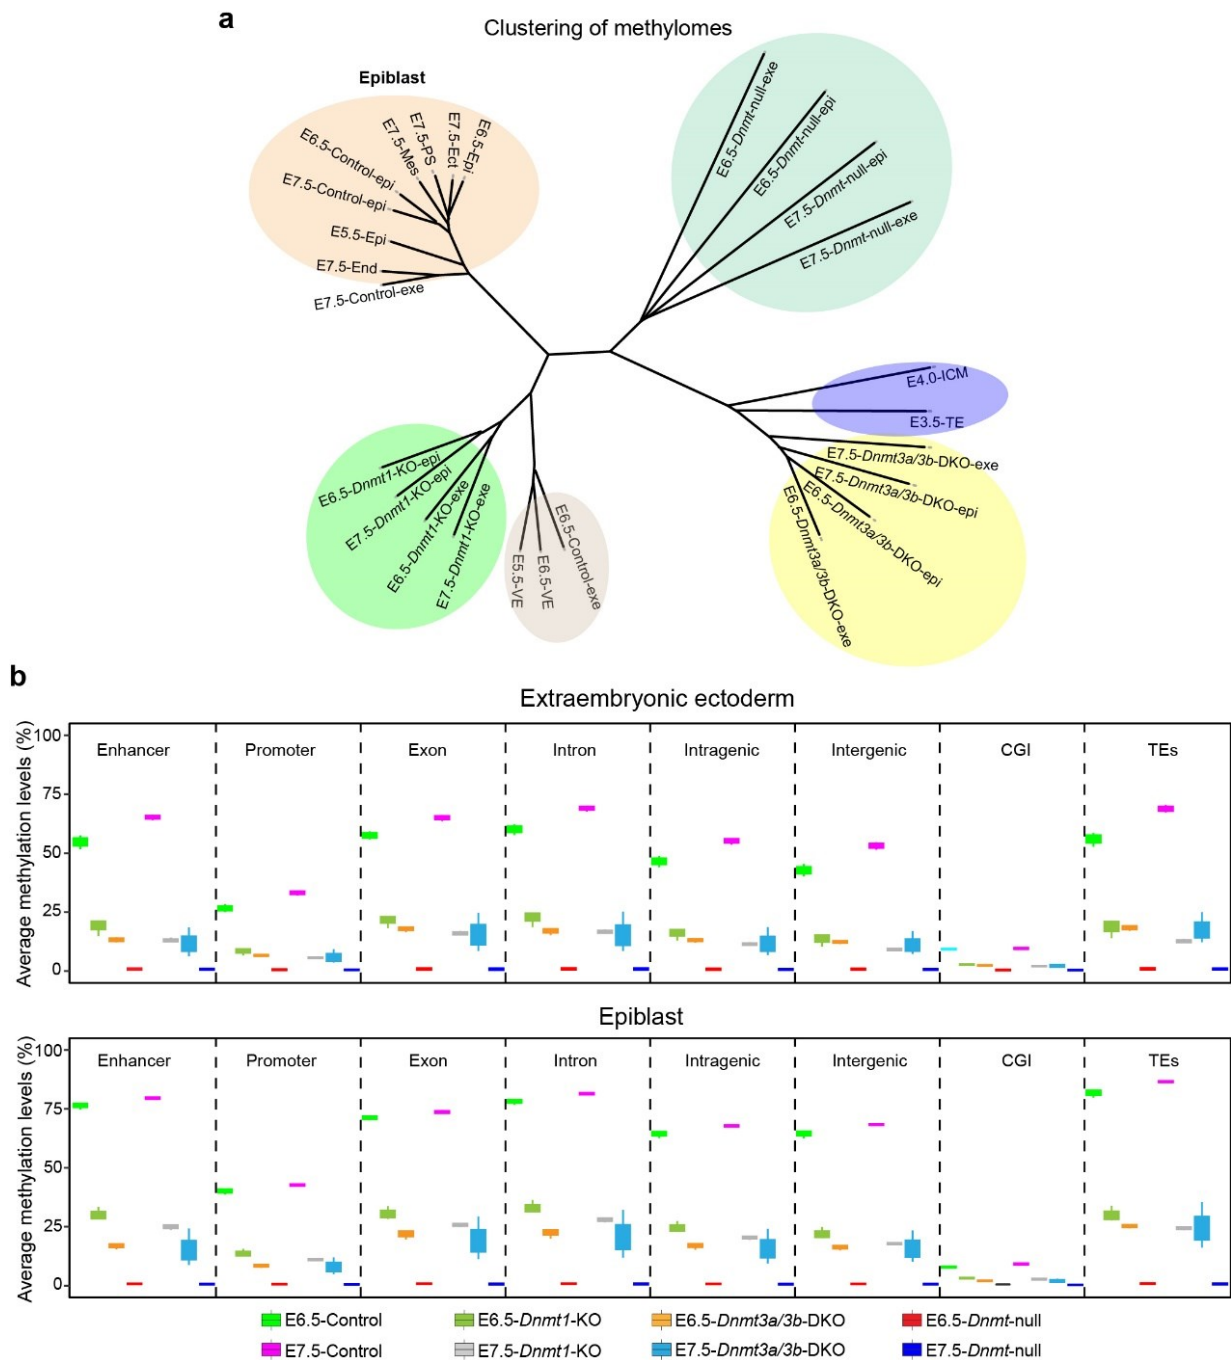

**Supplementary Fig. 9 | Methylome analysis of *Dnmt* mutant embryos.**

**a**, A dendrogram showing clustering of methylomes for Exe and Epi of four genotypes (control, *Dnmt1*-KO, *Dnmt3a/3b*-DKO, and *Dnmt*-null embryos) at E6.5 and E7.5. The methylome data of early embryos are produced by a previous study<sup>2</sup>. ICM, inner cell mass; TE, trophectoderm; VE, visceral endoderm; Ect, ectoderm; End, endoderm; Mes, mesoderm; PS, primitive streak. **b**, Box plots of CG methylation levels measured by WGBS in different annotated genomic elements in Exe and Epi of four genotypes at E6.5 and E7.5. The central lines are the median of data. The lower and upper hinges correspond to the 25th and 75th percentiles. The end of the lower and upper whiskers are 1.5 \* IQR (inter-quartile range). Data beyond the end of the whiskers are plotted as outliers. All source data are provided as a Source Data file.



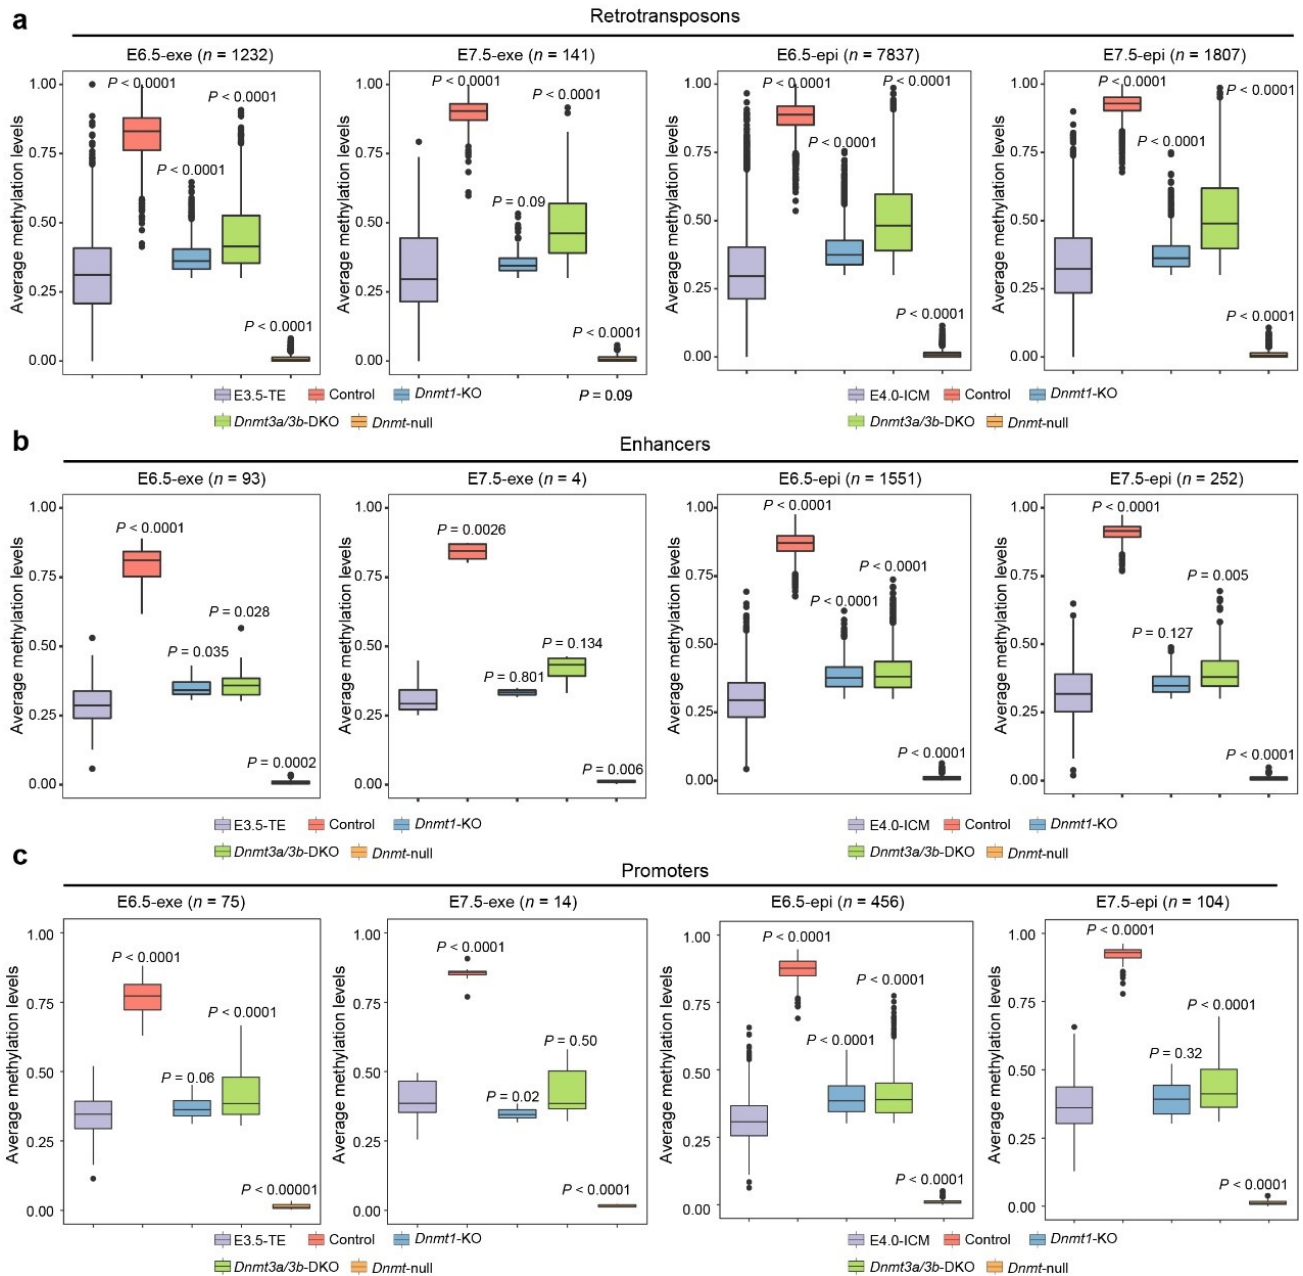

**Supplementary Fig. 10 | DNA methylation analysis of the overlapped hypermethylated elements maintained by DNMT1 and/or DNMT3A/3B.**

**a, b, c,** Box plots showed methylation levels of overlapped hypermethylated retrotransposons (**a**), enhancers (**b**), promoters (**c**) between *Dnmt1*-KO vs *Dnmt*-null and *Dnmt3a/3b*-DKO vs *Dnmt*-null in Exe and Epi at E6.5 and E7.5 related to Fig. 6b. E3.5 TE and E4.0 ICM data obtained from a previous study<sup>2</sup> show that DNA methylation has been deposited on these loci at the blastocyst stage. *n*, the number of overlapped elements. *P*-values were determined by Student's unpaired two-sided *t*-test. The central lines are the median of data. The lower and upper hinges correspond to the 25th and 75th percentiles. The end of the lower and upper whiskers are 1.5 \* IQR (interquartile range). Data beyond the end of the whiskers are plotted as outliers. All source data are provided as a Source Data file.

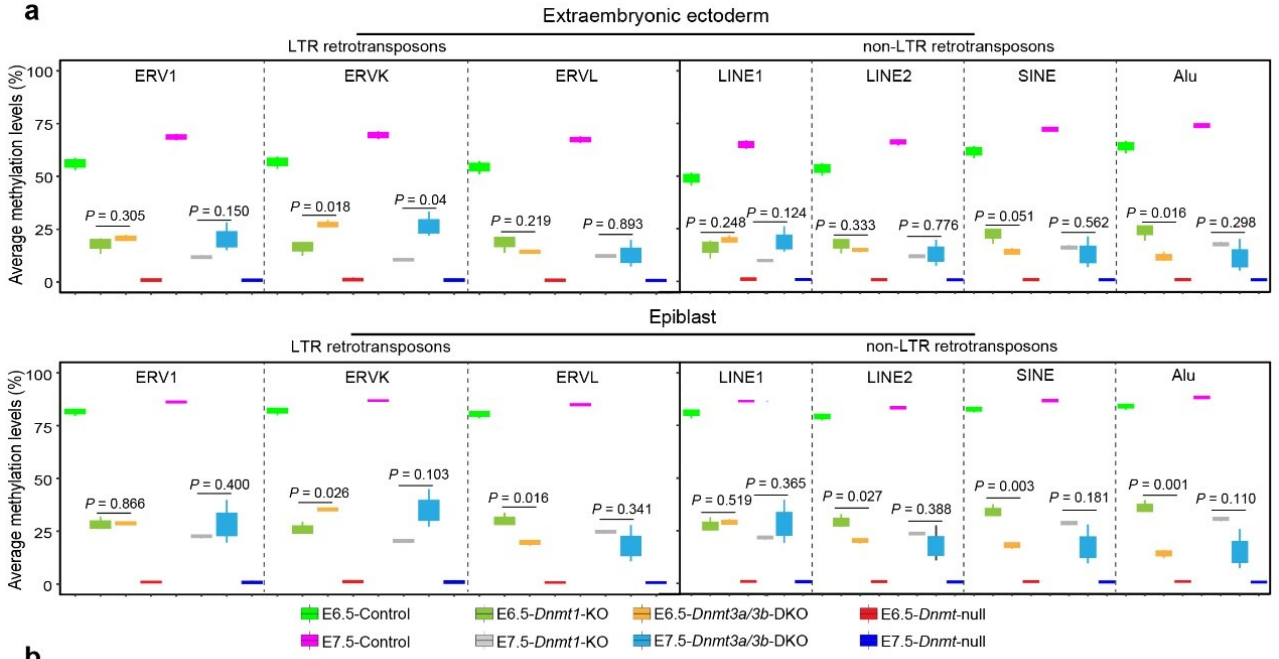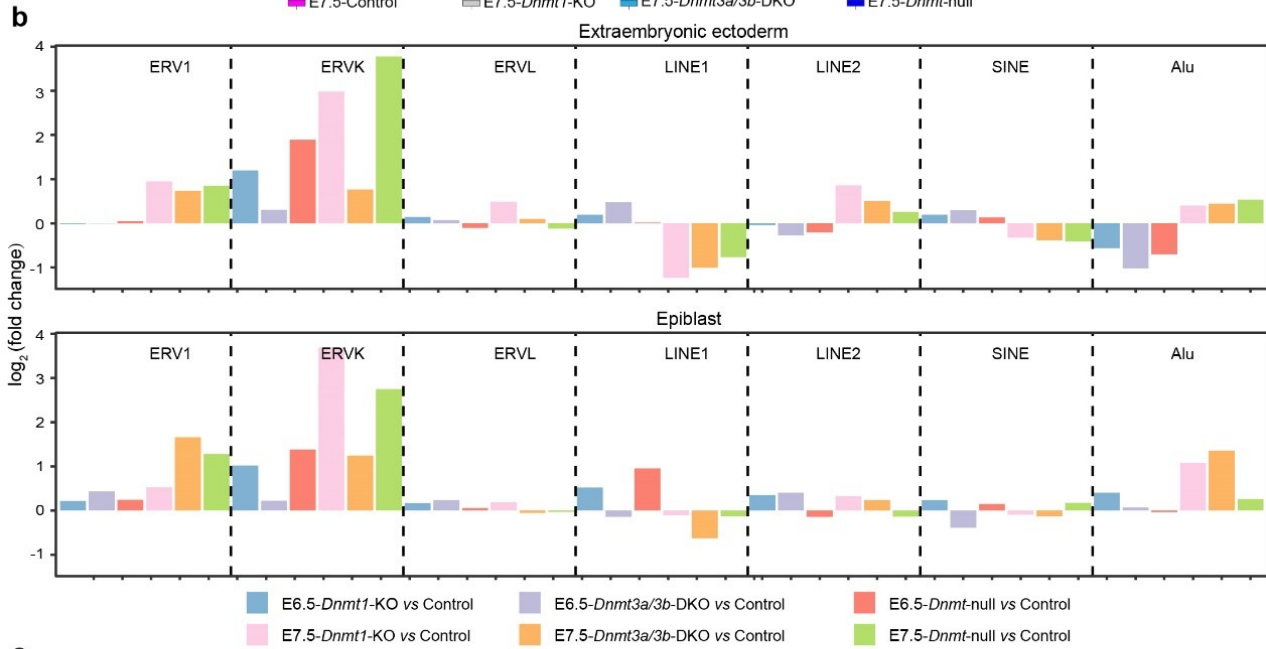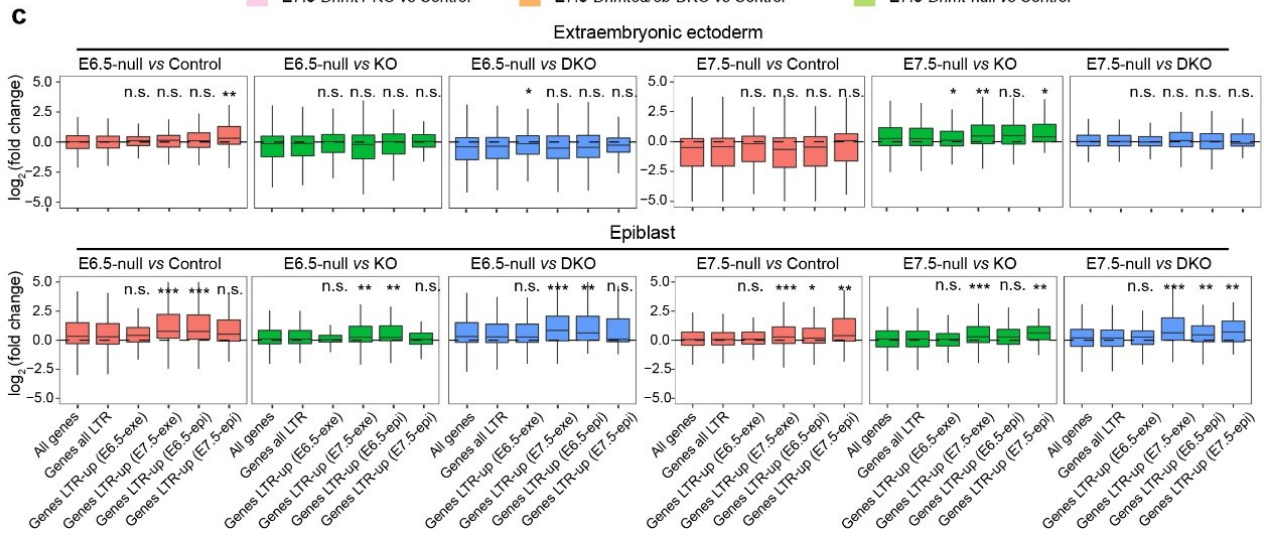

**Supplementary Fig. 11 | Upregulation of retrotransposons and retrotransposon-related genes in *Dnmt* mutant embryos.**

**a**, Box plots show CG methylation levels of retrotransposons in Exe and Epi with different mutations at E6.5 and E7.5 measured by WGBS, including LTR retrotransposons (long terminal repeats) and non-LTR retrotransposons. The central lines are the median of data. The lower and upper hinges correspond to the 25th and 75th percentiles. The end of the lower and upper whiskers are  $1.5 * IQR$  (inter-quartile range). Data beyond the end of the whiskers are plotted as outliers. *P*-values were determined by unpaired two-sided *t*-test. ERVs, endogenous retroviruses; LINEs, long interspersed elements; SINEs, short interspersed elements; the Alu sequences are named based on sharing a common cleavage site for the AluI restriction enzyme. **b**, Expression of retrotransposon families, including ERV1, ERVK, ERVL, LINE1, LINE2, SINE, and Alu, in Exe and Epi at E6.5 and E7.5 measured by RNA-seq, indicating that ERVK was significantly up-regulated in *Dnmt* mutant embryos (fold change  $> 2$ ). **c**, Expression of all genes, genes located close to all LTRs ( $\pm 20$ kb), and genes located close to up-regulated LTRs in *Dnmt*-null (compared to both *Dnmt1*-KO and *Dnmt3a/3b*-DKO). The central lines are the median of data. The lower and upper hinges correspond to the 25th and 75th percentiles. The end of the lower and upper whiskers are  $1.5 * IQR$  (inter-quartile range). Data beyond the end of the whiskers are plotted as outliers. *P*-values were calculated between the up-regulated LTR groups and All-LTR group by the two-sided Wilcoxon test. The exact *P*-values were listed in Source Data file. All source data are provided as a Source Data file.

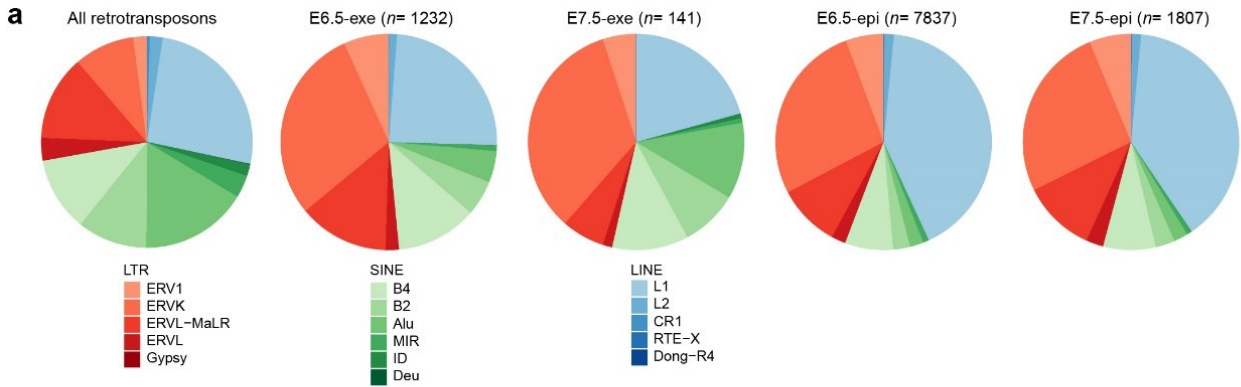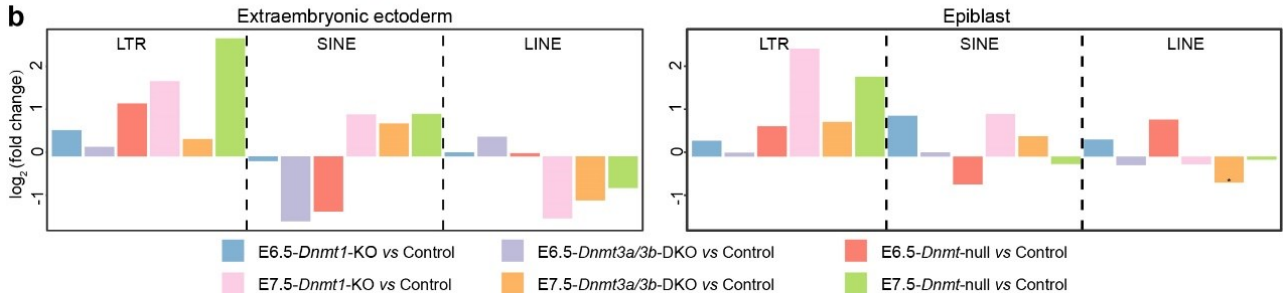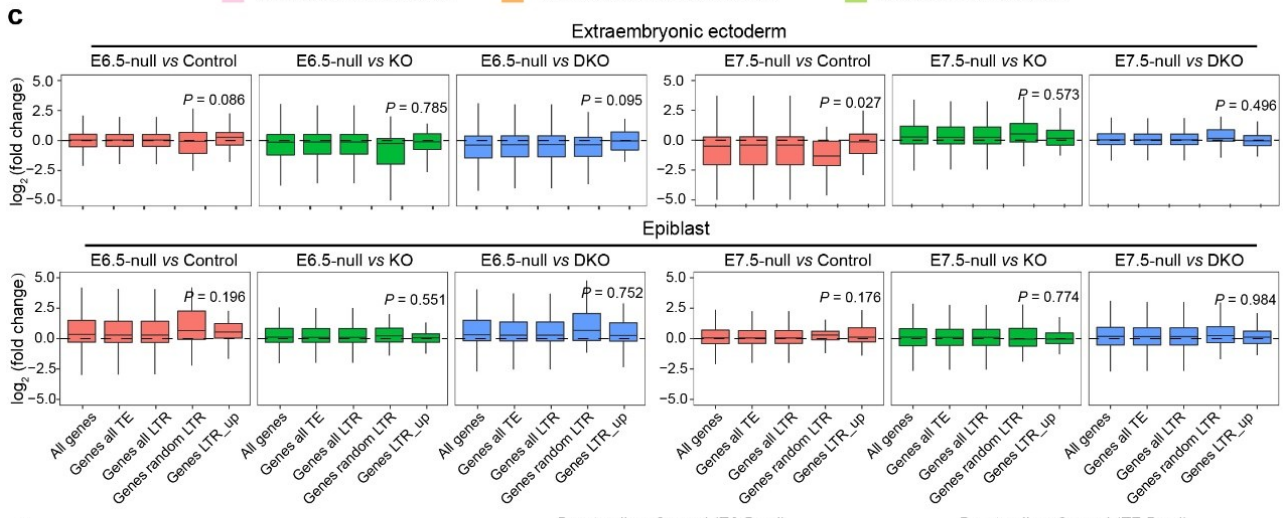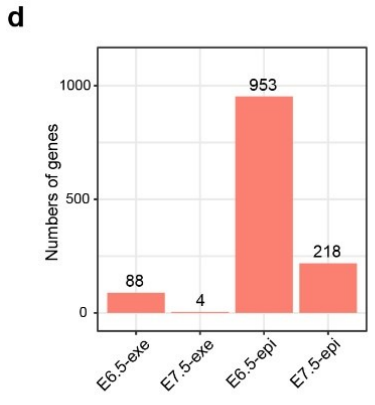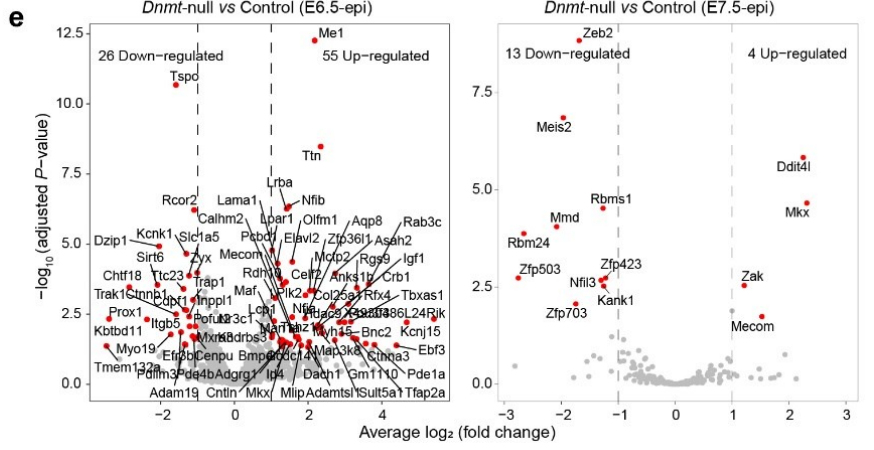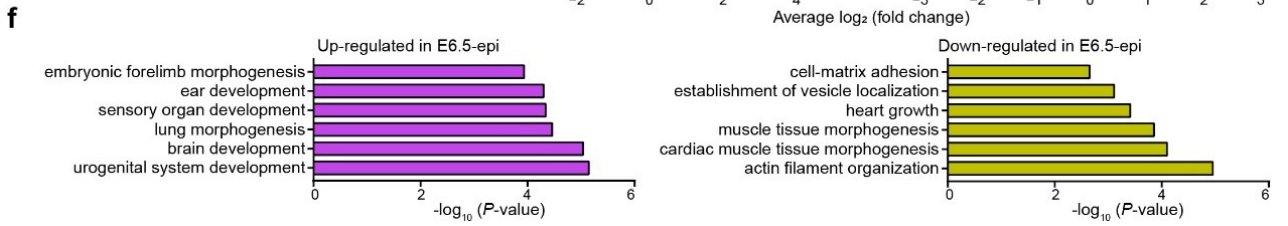

**Supplementary Fig. 12 | Slight influence of overlapped methylated retrotransposons and enhancers on gene expression in *Dnmt*-null embryos.**

**a**, Pie charts show the distribution of retrotransposon families in overlapped hypermethylated retrotransposons of Exe and Epi at E6.5 and E7.5 related to Fig. 6b. All retrotransposons show the distribution of retrotransposon families in the mouse genome. **b**, Expression of overlapped methylated retrotransposons (class LTR, SINE, and LINE) in Exe and Epi at E6.5 and E7.5, indicating that overlapped LTRs were upregulated in *Dnmt* mutant embryos. **c**, Expression of all genes, genes located close to all TEs, genes located to all LTRs, genes located to random LTRs ( $n = 50$ ), and genes located close to all up-regulated LTRs with DNA hypomethylation in *Dnmt*-null (compared to *Dnmt1*-KO and *Dnmt3a/3b*-DKO) in Exe and Epi at E6.5 and E7.5. The central lines are the median of data. The lower and upper hinges correspond to the 25th and 75th percentiles. The end of the lower and upper whiskers are  $1.5 * IQR$  (interquartile range). Data beyond the end of the whiskers are plotted as outliers. *P*-values were calculated between LTR-up and All-LTR by the two-sided Wilcoxon test. **d**, Bar plots show the numbers of genes regulated by the overlapped hypermethylated enhancers (HMEs) in Exe and Epi at E6.5 and E7.5 related to Fig. 6b. **e**, Volcano plots show the DEGs (fold change  $> 2$  and adjusted *P*-value  $< 0.05$ ) in HME-regulated genes in E6.5 and E7.5 Epi. *P*-values were calculated by Deseq2. **f**, Gene Ontology enrichments of DEGs in HME-regulated genes in E6.5 Epi related to (e). *P*-values were calculated by Metascape. All source data are provided as a Source Data file.



**Supplementary Fig. 13 | Analysis of overlapped HMP-related genes.**

**a**, Scatter diagrams show the DNA methylation level and RNA expression level of the protein coding genes related to HMPs in Exe and Epi of four genotypes at E6.5 and E7.5 (no overlapped protein coding genes related to HMPs identified in E7.5 Exe). **b**, Pearson's correlation of DNA methylation and RNA expression of the protein coding genes related to **(a)**, indicating that the expression of protein coding genes related to HMPs is not influenced by DNA methylation. *P*-value was determined by two-sided R function 'cor.test' which is based on Pearson's coefficient and follows in a *t* distribution. **c**, Density plots show the distribution of gene length of the HMP-related genes and non-HMP-related genes. HMPs contain all the overlapped HMPs shown in Fig. 6b; Non-HMPs refer to other gene promoters besides the HMPs. **d**, Histograms show the distribution of covered CGI length in HMP-related genes and non-HMP-related genes, indicating lack of CGI regions in the promoter of the overlapped HMP-related genes. All source data are provided as a Source Data file.

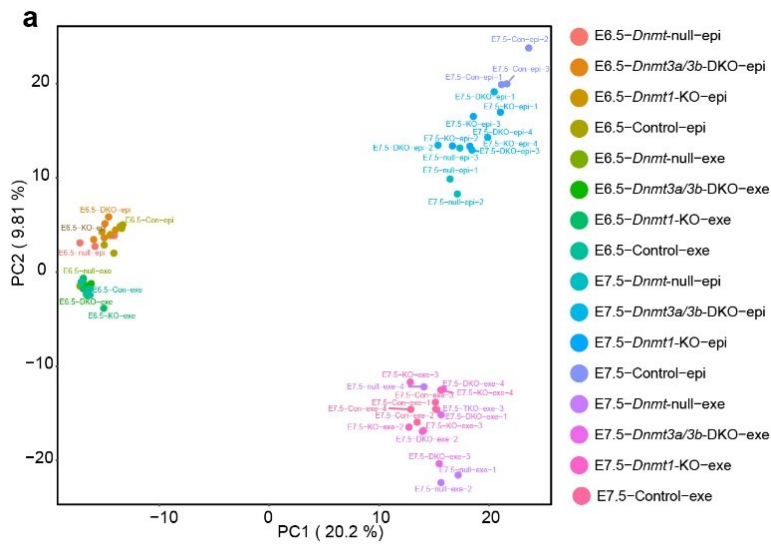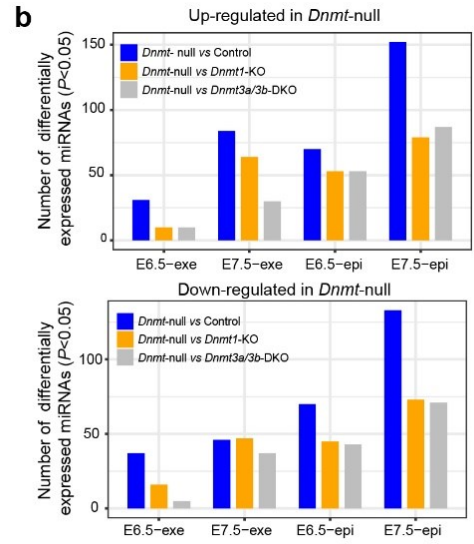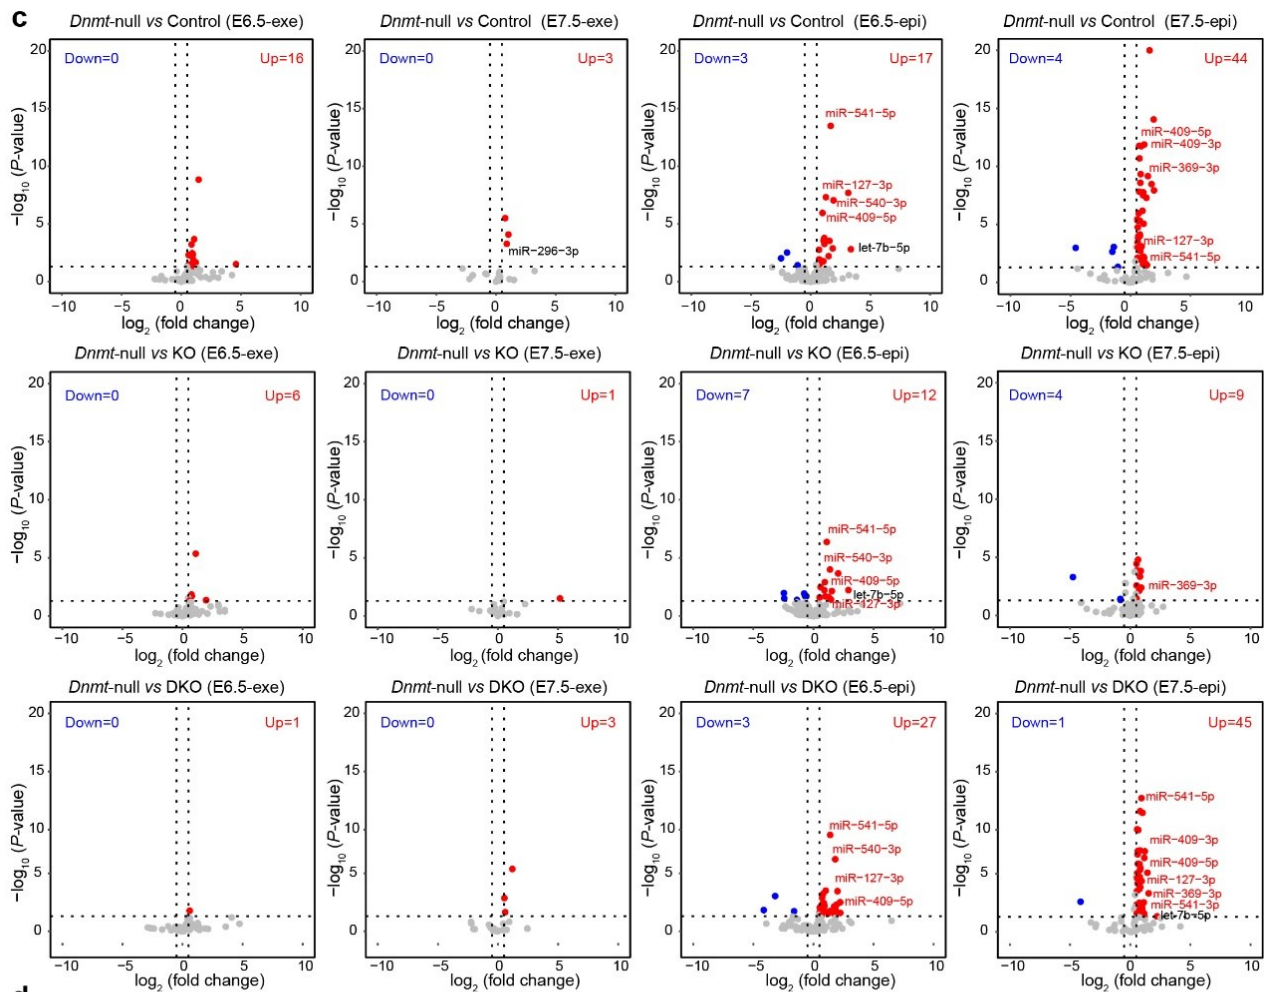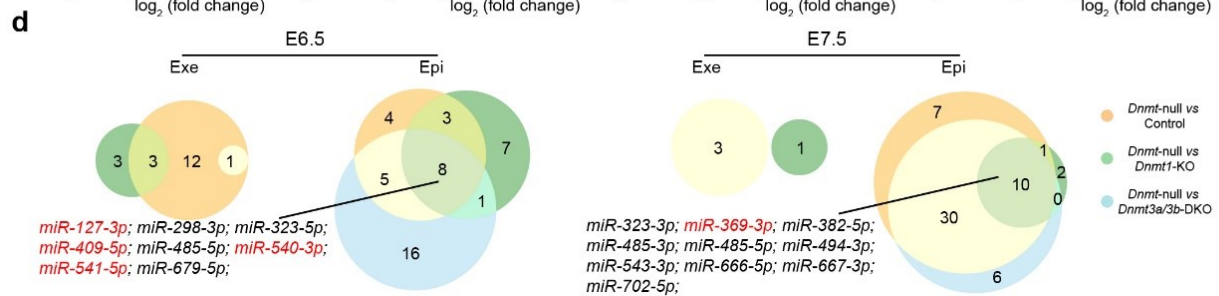



**Supplementary Fig. 14 | HMP-related miRNAs are up-regulated in *Dnmt*-null embryos.**

**a**, PCA analysis of miRNA profiling of Exe and Epi from four groups (control, *Dnmt1*-KO, *Dnmt3a/3b*-DKO, and *Dnmt*-null) at E6.5 and E7.5. **b**, Bar plots represent the number of significantly up-regulated and down-regulated miRNAs in *Dnmt*-null embryos, compared to control, *Dnmt1*-KO, and *Dnmt3a/3b*-DKO, respectively. *P*-values were calculated by Deseq2. **c**, Volcano plots show the differentially expressed miRNAs related to overlapped HMPs, including *Dnmt*-null compared to control, *Dnmt1*-KO, and *Dnmt3a/3b*-DKO. *let-7b-3p* and *miR-296-3p* highlighted in black are not located at the *Dlk1-Dio3* locus. *P*-values were calculated by Deseq2;  $\text{Log}_2$  (fold change) > 0.5; *P*-value < 0.05. **d**, Venn diagrams show overlapped differentially expressed miRNAs related to HMPs shown in Fig. 7a among *Dnmt*-null vs control, *Dnmt*-null vs *Dnmt1*-KO, and *Dnmt*-null vs *Dnmt3a/3b*-DKO in Exe and Epi at E6.5 and E7.5. Overlapped miRNAs are shown below and the miRNAs highlighted in red are deleted for the functional analysis below. All source data are provided as a Source Data file.

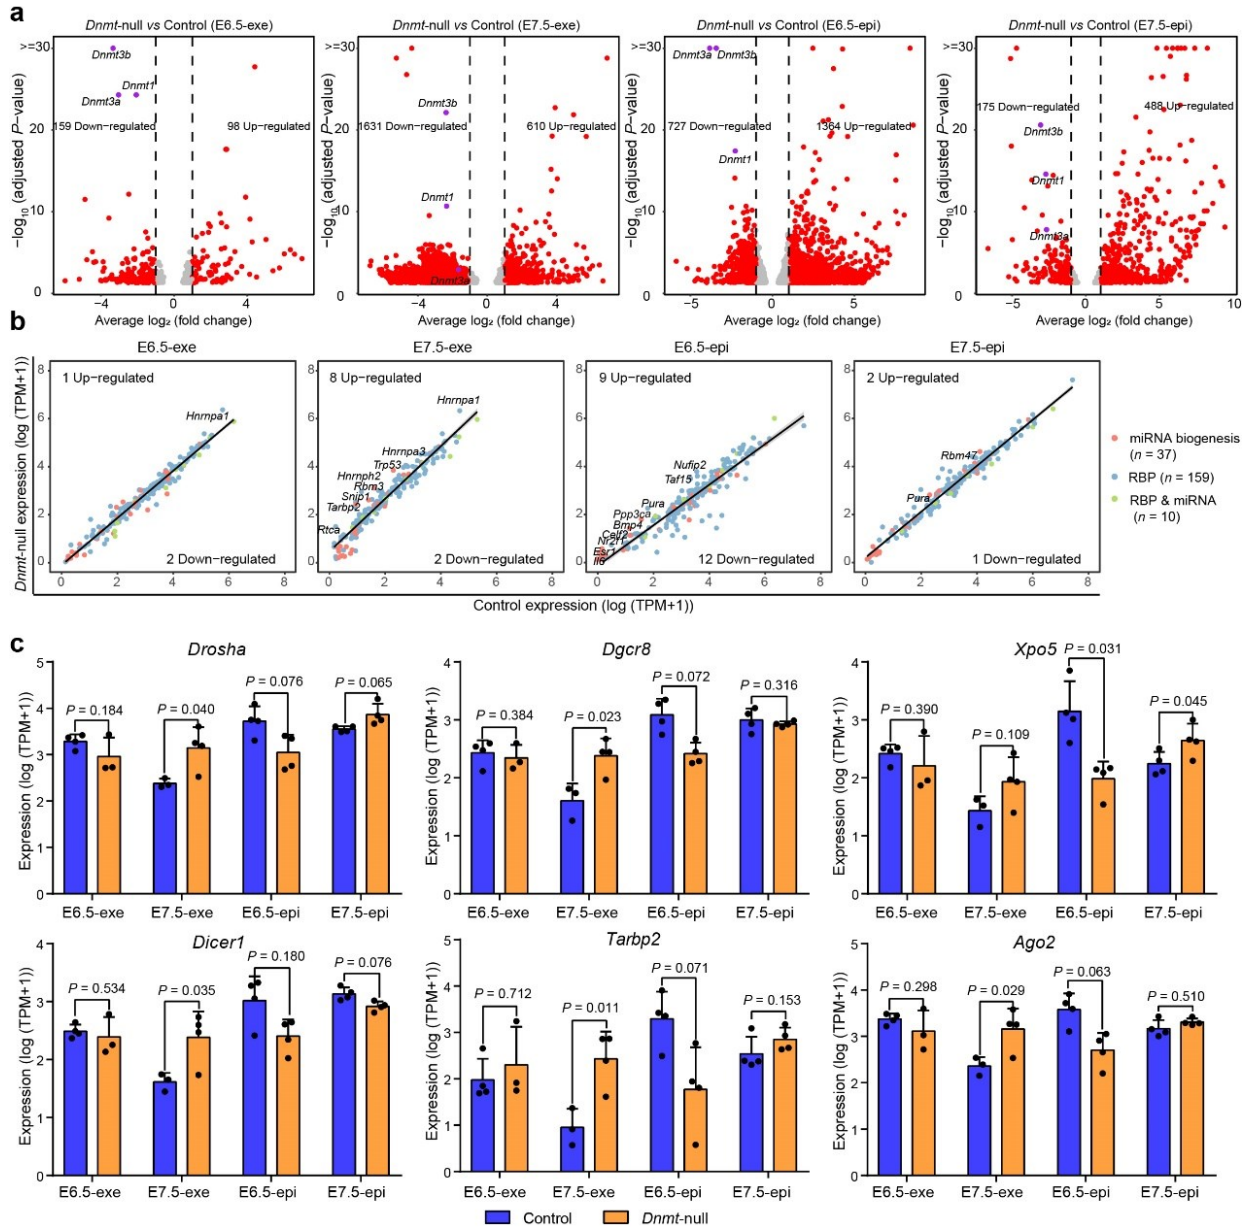

### Supplementary Fig. 15 | miRNAs biogenesis-related pathways are not affected in *Dnmt*-null embryos.

**a**, Volcano plots show differentially expressed genes between *Dnmt*-null and control in Exe and Epi at E6.5 and E7.5 (adjusted  $P$ -value  $< 0.05$ , FC  $> 2$ ).  $P$ -values were calculated by *DESeq2*. **b**, Plots show the expression of genes encoding miRNA biogenesis-related proteins ( $n = 37$ , from GO0035196 in MGI), RNA-binding proteins (RBP,  $n = 159$ , identified by Treiber et al.<sup>3</sup>), and both ( $n = 10$ ) in control and *Dnmt*-null embryos (adjusted  $P$ -value  $< 0.05$ , FC  $> 2$ ). A few genes were up-regulated in *Dnmt*-null embryos, majority of which are RNA binding proteins that may be not critical for miRNA biogenesis. **c**, Expression of key genes related to miRNA biogenesis in control and *Dnmt*-null embryos. Data are mean  $\pm$  s.e.m of four biological replicates.  $P$ -values were determined by Student's unpaired two-sided  $t$ -test. All source data are provided as a Source Data file.

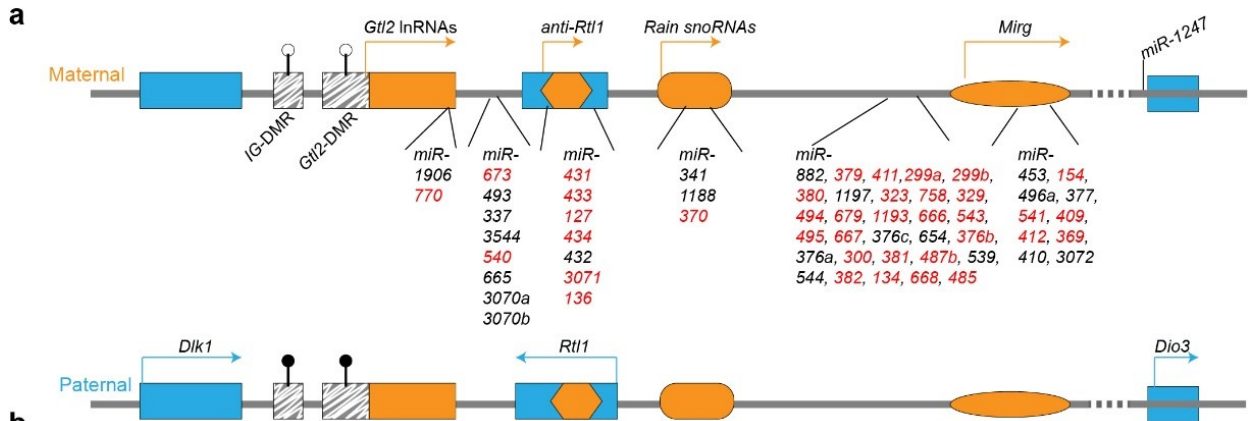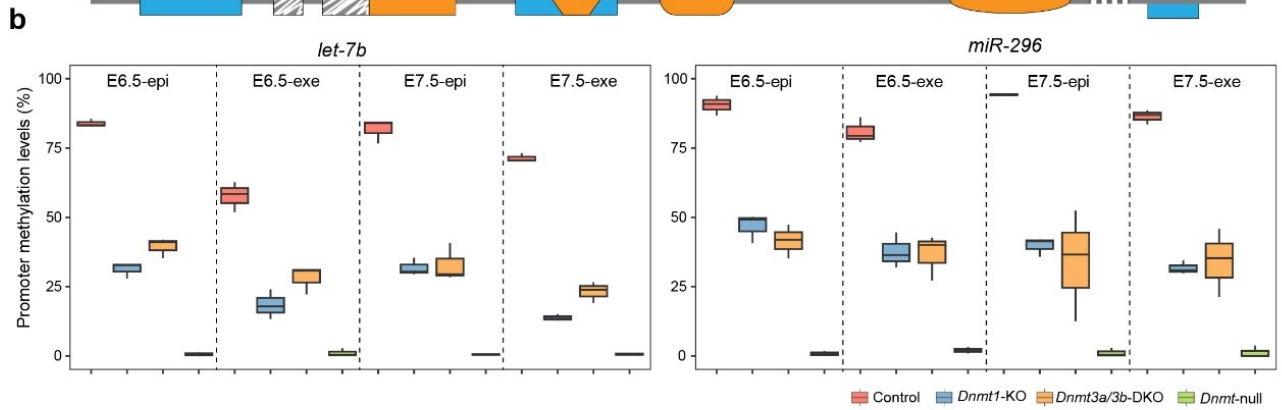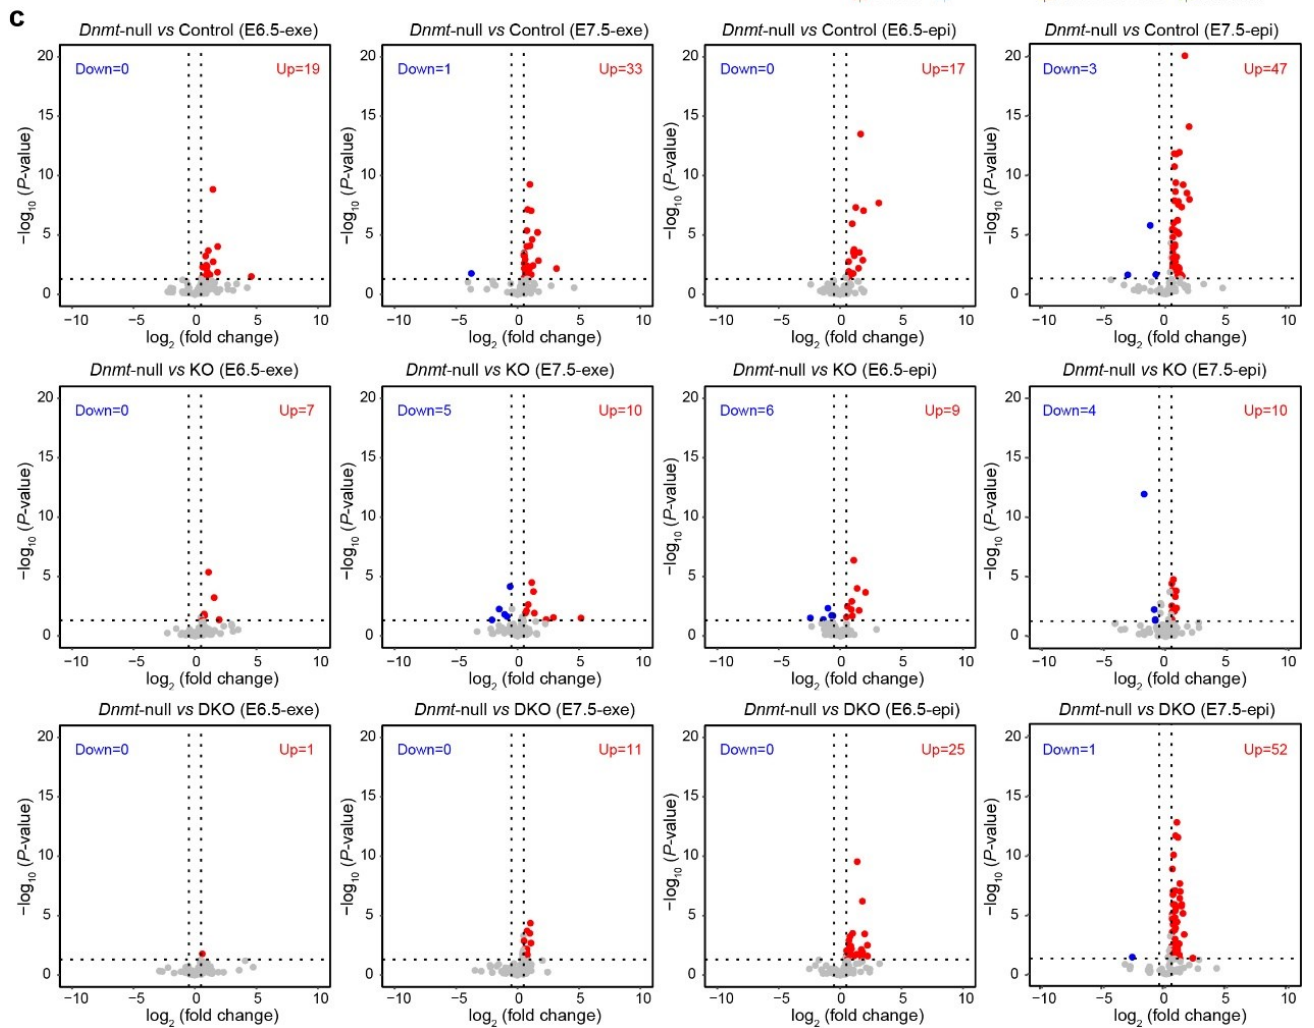

**Supplementary Fig. 16 | The majority of up-regulated HMP-related miRNAs in *Dnmt*-null embryos are located at the *Dlk1-Dio3* imprinting region.**

**a**, Schematic illustration of *Dlk1-Dio3* miRNAs on mouse chromosome 12. The miRNAs highlighted in red were up-regulated in *Dnmt*-null embryos compared to control. **b**, Box plots show CG methylation levels of promoters (TSS  $\pm$  2kb) of *let-7b* and *miR-296* in different mutant embryos at E6.5 and E7.5 measured by WGBS. The central lines are the median of data. The lower and upper hinges correspond to the 25th and 75th percentiles. The end of the lower and upper whiskers are 1.5 \* IQR (inter-quartile range). Data beyond the end of the whiskers are plotted as outliers. **c**, Volcano plots show the differently expressed *Dlk1-Dio3* miRNA in *Dnmt*-null compared to control, *Dnmt1*-KO, and *Dnmt3a/3b*-DKO. *P*-values were calculated by Deseq2; Log<sub>2</sub> (fold change) > 0.5; *P*-value < 0.05. All source data are provided as a Source Data file.

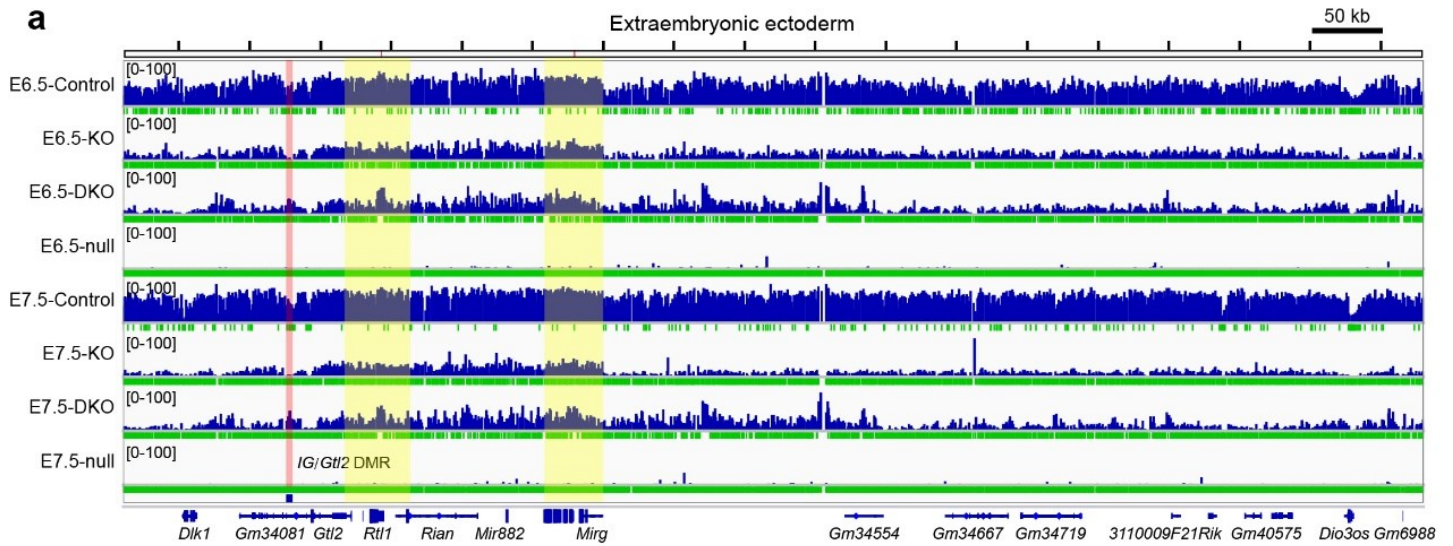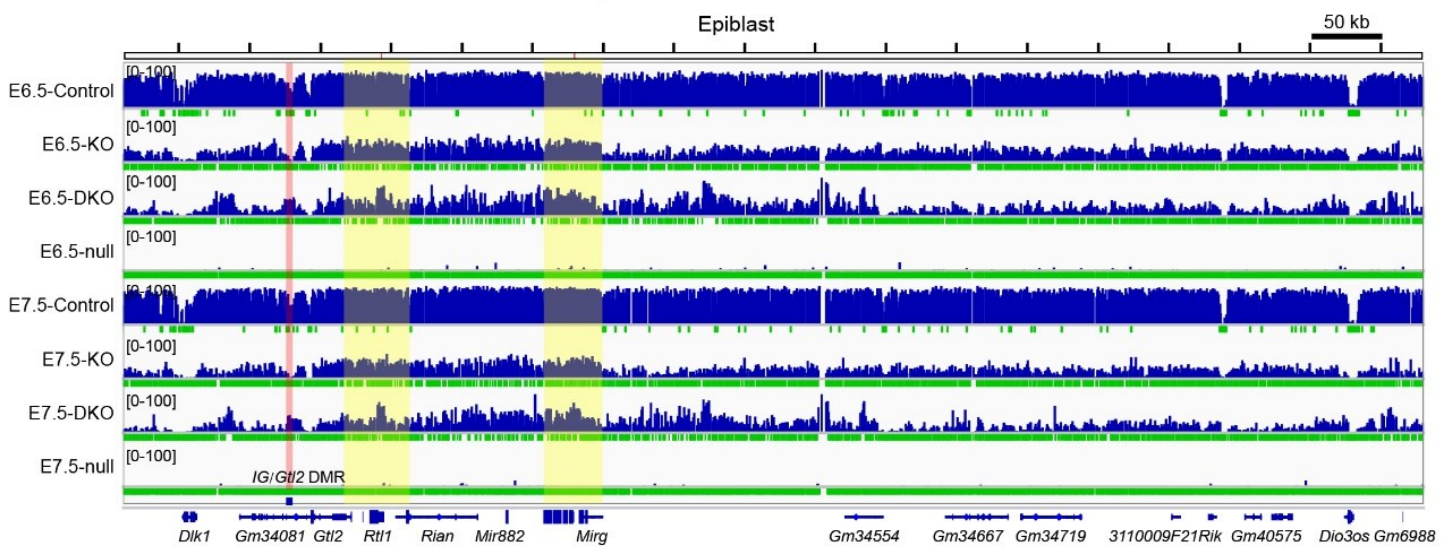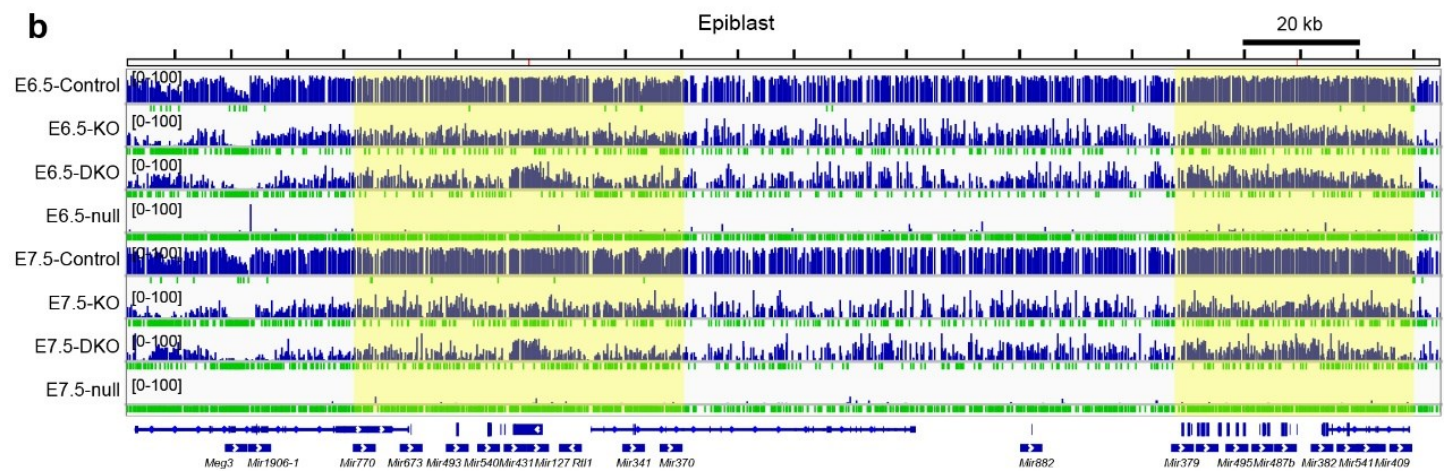

**Supplementary Fig. 17 | Methylation state of the *Dlk1-Dio3* locus in *Dnmt* mutant embryos.**

**a**, Representative genome browser snapshots of *Dlk1-Dio3* methylation profiles for Exe and Epi of four groups (control, *Dnmt1*-KO, *Dnmt3a/3b*-DKO, and *Dnmt*-null embryos) at E6.5 and E7.5. The red-shaded box indicates the *IG/Gtl2* DMR (differentially DNA-methylated region). The yellow-shaded box indicates the promoter regions containing many miRNAs. Green bars below the horizontal line denote the cytosine detected as unmethylated to discriminate from undetected cytosine sites. Resolution, 50kb. **b**, Representative genome browser snapshots of promoter methylation profiles for Epi of four groups at E6.5 and E7.5. The yellow-shaded box indicates the promoter regions containing many miRNAs. Resolution, 20kb. All source data are provided as a Source Data file.

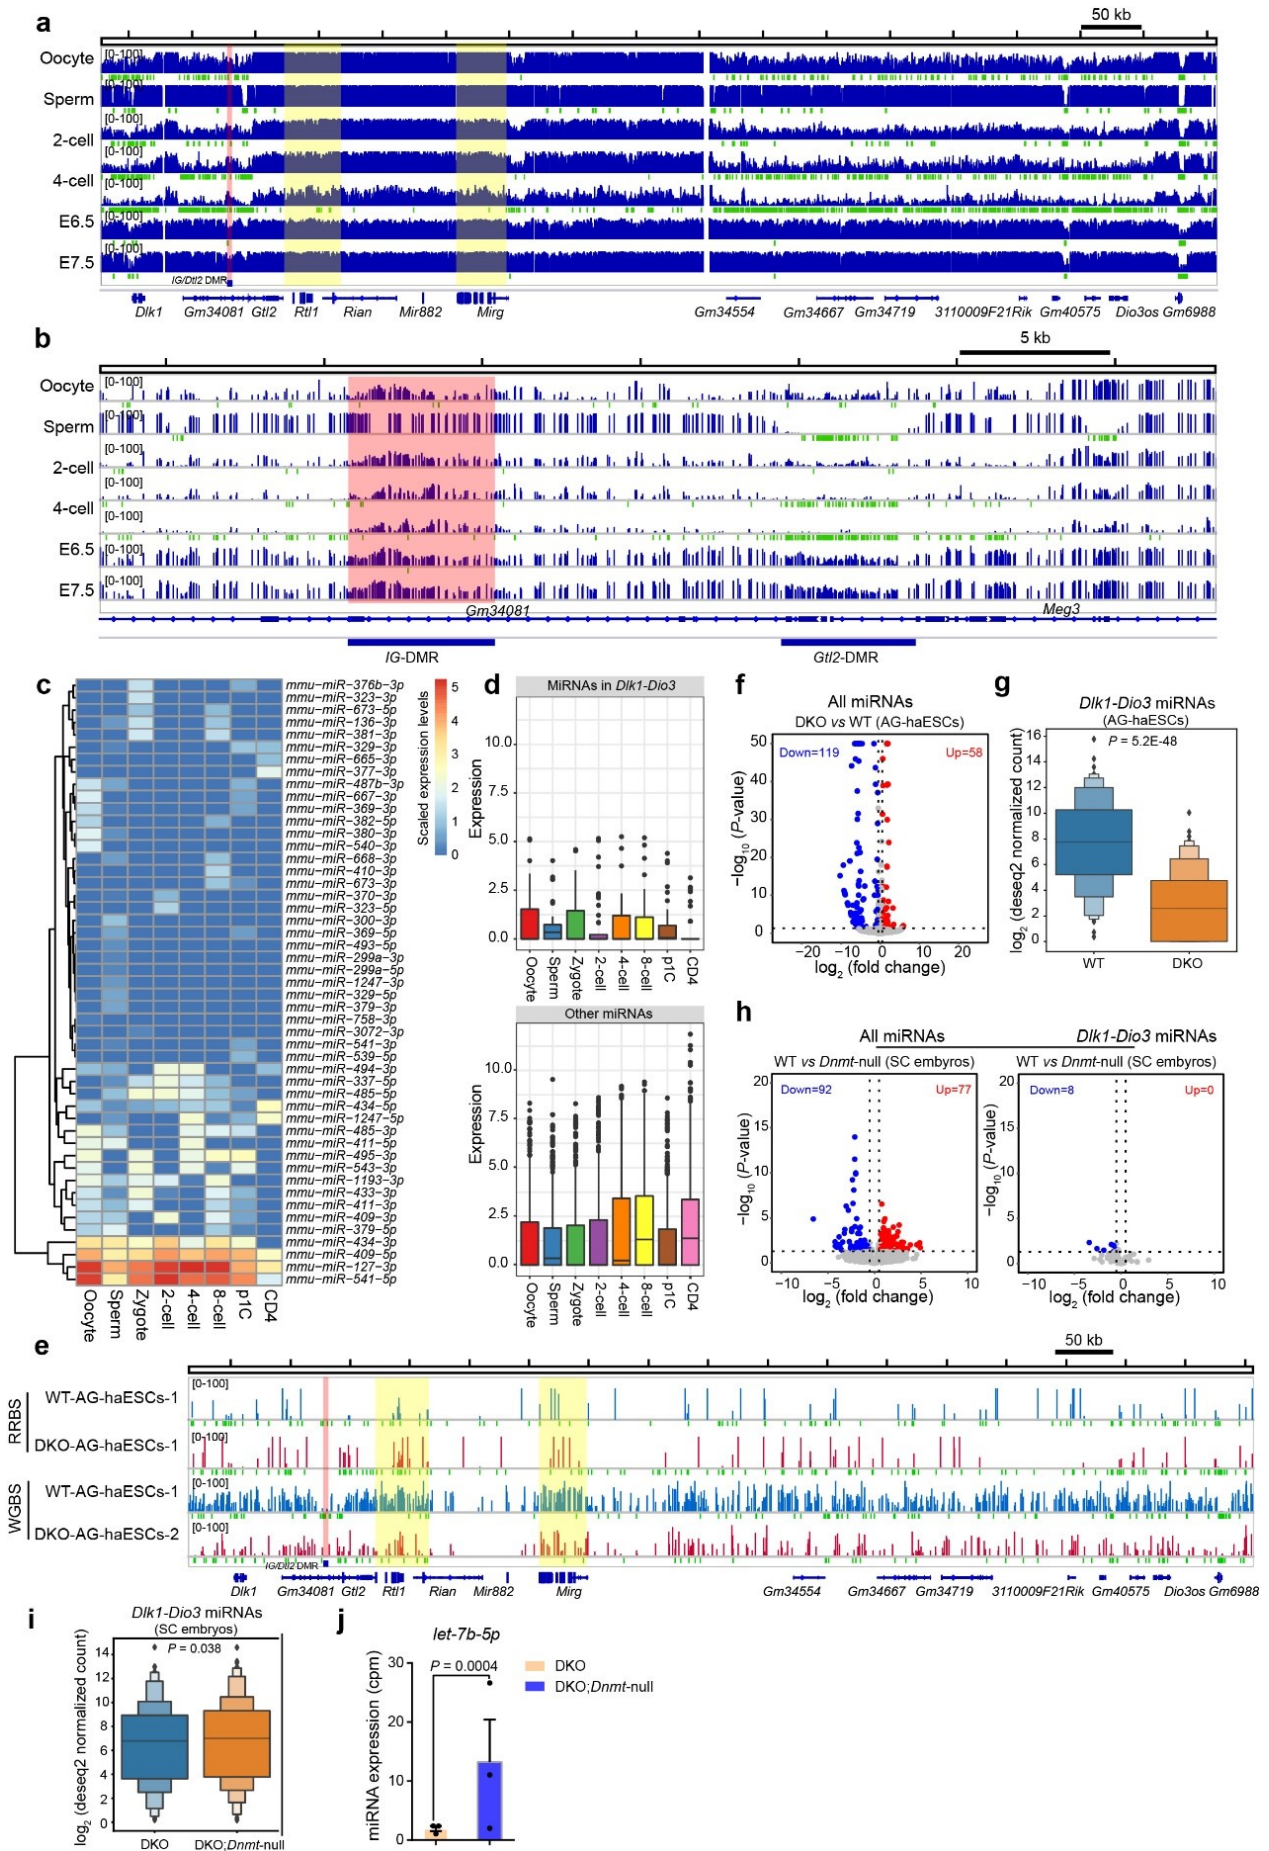

**Supplementary Fig. 18 | *Dlk1-Dio3* miRNAs are suppressed in pre-implantation embryos and DKO-AG-haESCs.**

**a**, Genome browser view of *Dlk1-Dio3* methylation profiles in gametes and early embryos (GSE56697<sup>4</sup>). The red-shaded box indicates the *IG/Gtl2* DMRs. The yellow-shaded box indicates the promoter regions containing miRNAs. Green bars below the horizontal line denote the cytosine detected as unmethylated to discriminate from undetected cytosine sites. Resolution, 50kb. **b**, Genome browser view of *IG*-DMR and *Gtl2*-DMR methylation profiles. The red-shaded box indicates the *IG*-DMR. Resolution, 5kb. **c**, Heatmap shows the expression of *Dlk1-Dio3* miRNAs in gametes and early embryos (SRP045287<sup>5</sup>). p1C, parthenogenetic one-cell embryos. **d**, Bar plots show the expression of *Dlk1-Dio3* miRNAs and other miRNAs in gametes and pre-implantation embryos. The central lines are the median of data. The lower and upper hinges correspond to the 25th and 75th percentiles. The end of the lower and upper whiskers are  $1.5 * \text{IQR}$  (inter-quartile range). Data beyond the end of the whiskers are plotted as outliers. **e**, Genome browser view of *Dlk1-Dio3* methylation profiles of WT-AG-haESCs and DKO-AG-haESCs (GSE60076<sup>6</sup> and GSE168447<sup>7</sup>). The red-shaded box indicates the *IG/Gtl2* DMRs. The yellow-shaded box indicates the promoter regions containing miRNAs. Green bars are the same as those in **a**. Resolution, 50kb. **f**, Volcano plot shows the differently expressed miRNAs of DKO-AG-haESCs compared to WT-AG-haESCs<sup>8</sup> in all miRNAs. *P*-values were calculated by Deseq2; *P*-value < 0.05. **g**, Bar plot shows the expression of *Dlk1-Dio3* miRNAs between WT-AG-haESCs and DKO-AG-haESCs. *P*-values were determined by Student's two-sided paired *t*-test. **h**, Volcano plots show the differently expressed miRNAs of SC embryos from WT-AG-haESCs compared to *Dnmt*-null SC embryos. *P*-values were calculated by Deseq2; *P*-value < 0.05. **i**, Bar plot shows the expression of *Dlk1-Dio3* miRNAs between SC embryos from DKO-AG-haESCs and *Dnmt*-null SC embryos. The total RNA used in **h** and **i** extracted from the E6.5 SC epiblast. *P*-values were determined by Student's two-sided paired *t*-test. **j**, Expression of *let-7b-5p* in SC embryos from DKO-AG-haESCs and *Dnmt*-null SC embryos. Data are mean  $\pm$  s.e.m of three biological replicates. Cpm means counts per million. *P*-values were calculated by Deseq2. All source data are provided as a Source Data file.



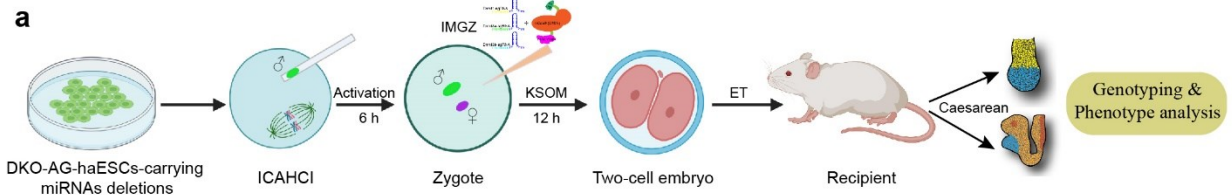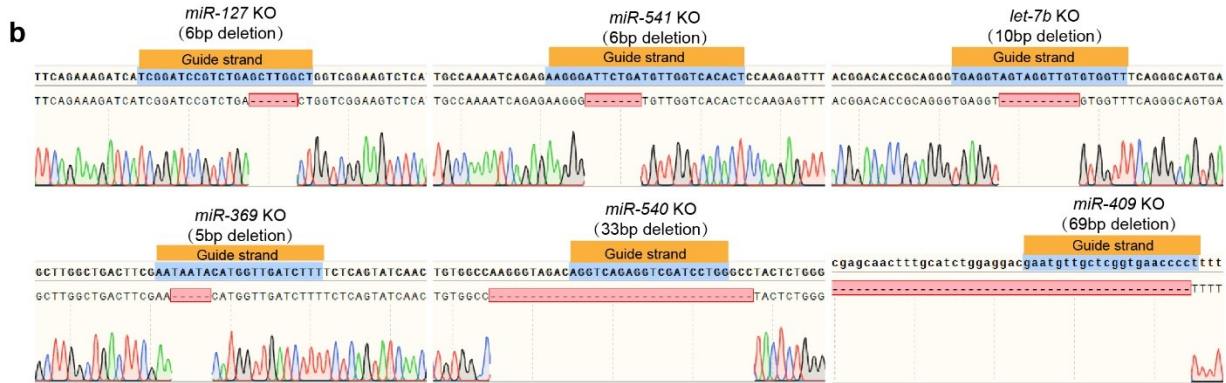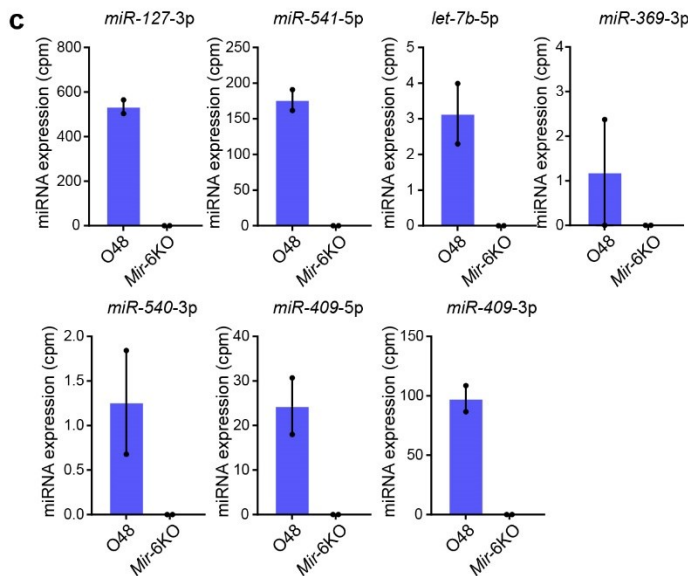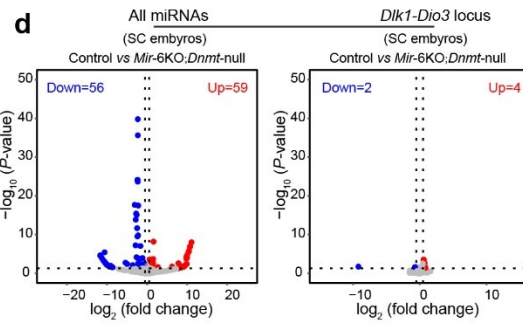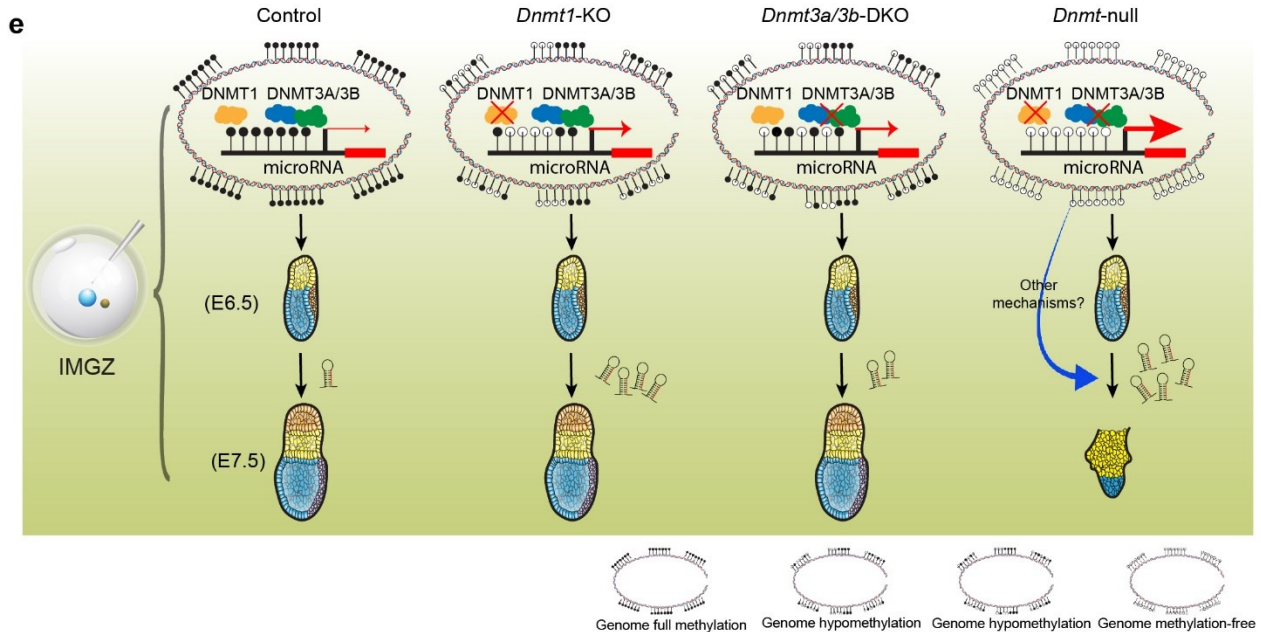

### Supplementary Fig. 19 | Dosage of *Dlk1-Dio3* miRNAs may play roles in gastrulation.

**a**, Schematic diagram of strategies to investigate the function of miRNA dosage in gastrulation based on AG-haESC-mediated semi-cloning (SC) technology (created with BioRender.com). **b**, Chromatograms of Sanger sequencing confirm miRNA deletions in a DKO-AG-haESCs (also termed O48<sup>8</sup>), including *miR-127*, *miR-541*, *let-7b*, *miR-369*, *miR-540*, and *miR-409*. **c**, Expression of *miR-127-3p*, *miR-541-5p*, *let-7b-5p*, *miR-369-3p*, *miR-540-3p*, *miR-409-5p*, and *miR-409-3p* in O48 and *Mir-6KO* O48. Cpm means counts per million. Two independent repeats for each sample. Bar plots show the mean from two experimental replicates. **d**, Volcano plots show the differently expressed *Dlk1-Dio3* miRNAs between SC embryos from O48 compared and *Mir-6KO* SC embryos carrying *Dnmt*-null through the IMGZ system. The total RNA was extracted from the epiblast of SC embryos at E7.5. *P*-values were calculated by Deseq2;  $\text{Log}_2$  (fold change) > 0.5; *P*-value < 0.05. **e**, Summary of DNA methylation-mediated inhibition of miRNA expression in gastrulation revealed by IMGZ. The genome DNA methylation is completely lost in *Dnmt*-null embryos, stirring widespread effects on the transcriptome and epigenome. Some unknown mechanisms combined with upregulated miRNAs in the methylation-free embryos control embryo gastrulation. All source data are provided as a Source Data file.

### Supplementary References

- 1 Argelaguet, R. et al. Multi-omics profiling of mouse gastrulation at single-cell resolution. *Nature* 576, 487-491, doi:10.1038/s41586-019-1825-8 (2019).
- 2 Zhang, Y. et al. Dynamic epigenomic landscapes during early lineage specification in mouse embryos. *Nat Genet* 50, 96-105, doi:10.1038/s41588-017-0003-x (2018).
- 3 Treiber, T. et al. A Compendium of RNA-Binding Proteins that Regulate MicroRNA Biogenesis. *Molecular cell* 66, 270-284.e213, doi:10.1016/j.molcel.2017.03.014 (2017).
- 4 Wang, L. et al. Programming and inheritance of parental DNA methylomes in mammals. *Cell* 157, 979-991, doi:10.1016/j.cell.2014.04.017 (2014).
- 5 Yang, Q. et al. Highly sensitive sequencing reveals dynamic modifications and activities of small RNAs in mouse oocytes and early embryos. *Science advances* 2, e1501482, doi:10.1126/sciadv.1501482 (2016).
- 6 Zhong, C. et al. CRISPR-Cas9-Mediated Genetic Screening in Mice with Haploid Embryonic Stem Cells Carrying a Guide RNA Library. *Cell Stem Cell* 17, 221-232, doi:10.1016/j.stem.2015.06.005 (2015).
- 7 Zhang, H. et al. Epigenetic integrity of paternal imprints enhances the developmental potential of androgenetic haploid embryonic stem cells. *Protein & cell* 13, 102-119, doi:10.1007/s13238-021-00890-3 (2022).
- 8 Li, Q. et al. Temporal regulation of prenatal embryonic development by paternal imprinted loci. *Sci China Life Sci* 63, 1-17, doi:10.1007/s11427-019-9817-6 (2020).
